# Supplementary material
Source: publisher figshare collection journal article supplement (https://acs.figshare.com/ndownloader/files/3962929)

## Supporting Information

# ***Concise synthesis of Didebromohamacanthin B and Demethylaplysinopsine : Addition of Ethylenediamine and Guanidine Derivatives to the Pyrrole - Amino Acid Diketopiperazines in Oxidative Conditions***

*Ludmila Ermolenko, Hu Zhaoyu, Clarisse Lejeune, Carine Vergne, Céline Ratinaud, Thanh Binh Nguyen, and Ali Al-Mourabit\**

*Centre de Recherche de Gif-sur-Yvette, Institut de Chimie des Substances Naturelles, CNRS,  
91198 Gif-sur-Yvette Cedex, France*

| <b>Content</b>                                     | <b>Page</b> |
|----------------------------------------------------|-------------|
| <b>General considerations</b>                      | <b>S1</b>   |
| <b>Experimental Procedures</b>                     | <b>S2</b>   |
| <b>Copies of NMR spectra for all new compounds</b> | <b>S9</b>   |

### **General considerations**

Unless otherwise noted, reagents were purchased from Aldrich and used without further purification. *tert*-Butyl 3-(1,2-diaminoethyl)-1*H*-indole-1-carboxylate **5d** was purchased from Amra Scientific. **5b**.2HCl salt was given by Dr. Karchava A. (Moscow State University). Chromatographic purifications were performed by flash chromatography using silica gel P60 (230-400 mesh). THF was distilled from sodium/benzophenone. Anhydrous DMF and CH<sub>2</sub>Cl<sub>2</sub> were purchased from Aldrich. NMR spectra were recorded on Spectrometers Avance 300 MHz and 500 MHz Bruker. Chemical shifts (expressed in ppm) were referenced to the solvent peaks  $\delta_{\text{H}}$  2.05 and  $\delta_{\text{C}}$  29.9, 206.7 for acetone-*d*<sub>6</sub>,  $\delta_{\text{H}}$  2.50 and  $\delta_{\text{C}}$  39.5 for DMSO-*d*<sub>6</sub>,  $\delta_{\text{H}}$  7.26 and  $\delta_{\text{C}}$  77.2 for CDCl<sub>3</sub>,  $\delta_{\text{H}}$  3.58, 1.73 and  $\delta_{\text{C}}$  64.7, 25.2 for THF-*d*<sub>8</sub>,  $\delta_{\text{H}}$  8.04, 2.93, 2.72 and  $\delta_{\text{C}}$  162.4, 34.9, 29.8 for DMF-*d*<sub>7</sub>. HRMS mass spectra were obtained using electrospray source (Lockspray) coupled with a time of flight analyser (LCT, Micromass). Samples were prepared in acetonitrile and injected in the MS system using a Waters 2795 system. IR spectra were acquired (neat) using a Perkin Elmer Spectrometer BX FT-IR system.

## Experimental Procedures

### (*Z*)-*N*-(3-(2-amino-4-oxo-1*H*-imidazol-5(4*H*)-ylidene)propyl)-1*H*-pyrrole-2-carboxamide (**3aa**)

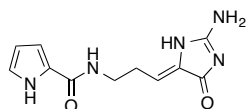

Diketopiperazine pyrrole-proline (**1a**) (190 mg, 1.0 mmol, 1 eq.) was added to a solution of Bu<sub>2</sub>S (0.62 mL, 4.0 mmol, 4 eq.) in dry DMF (25 mL) and stirred in the presence of O<sub>2</sub> flow for 1 h. Guanidine carbonate (360 mg, 2.0 mmol, 2 eq.) was added and the stirring was continued for 1 h at 60°C. The solvent was evaporated under vacuo and the residue was treated by column chromatography using CH<sub>2</sub>Cl<sub>2</sub> (sat. with NH<sub>3</sub>)/MeOH : 4/1 to afford **3aa** (230 mg, 95% yield). Analytical and spectroscopic data are in agreement with the literature data.<sup>1c</sup>

<sup>1</sup>H NMR (CD<sub>3</sub>OD, 300 MHz):  $\delta$  6.93 (m, 1H), 6.79 (m, 1H), 6.18 (m, 1H), 5.79 (m, 1H), 3.48 (m, 2H), 2.54 (m, 2H).

<sup>13</sup>C NMR (CD<sub>3</sub>OD, 75 MHz):  $\delta$  169.2, 163.7, 136.9, 126.9, 122.9, 111.7, 110.2, 106.1, 39.7, 28.6.

### (*Z*)-*N*-(3-(2,5-Dioxoimidazolidin-4-ylidene)propyl)-1*H*-pyrrole-2-carboxamide (**3ab**)

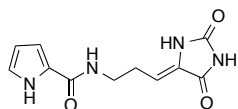

Diketopiperazine pyrrole-proline (**1a**) (50 mg, 0.26 mmol) was added to a solution of Bu<sub>2</sub>S (0.23 mL, 1.3 mmol, 5 eq.) in dry DMF (2.0 mL) and stirred in the presence of O<sub>2</sub> flow for 1 h. Urea (79 mg, 1.3 mmol, 5 eq.) and DBU (78  $\mu$ L, 0.53 mmol, 2 eq.) were added and the stirring was continued for 1 h. The solvent was evaporated in vacuo and the residue was purified by preparative TLC chromatography using CH<sub>2</sub>Cl<sub>2</sub> (sat. with NH<sub>3</sub>)/MeOH : 7/3 to afford **3ab** (30 mg, 40 % yield).

<sup>1</sup>H NMR (CD<sub>3</sub>OD, 300 MHz):  $\delta$  6.94 (m, 1H), 6.78 (dd,  $J$  = 1.7, 3.7 Hz, 1H), 6.19 (m, 1H), 5.70 (t,  $J$  = 8.0 Hz, 1H), 3.45 (t,  $J$  = 7.0 Hz, 2H), 2.49 (m, 2H).

<sup>13</sup>C NMR (CD<sub>3</sub>OD, 75 MHz):  $\delta$  176.5, 164.0, 163.6, 146.7, 126.9, 122.9, 111.7, 110.2, 106.1, 39.5, 28.6.

HRMS ESI<sup>+</sup>: [M+Na]<sup>+</sup>  $m/z$  calcd. for C<sub>11</sub>H<sub>12</sub>N<sub>4</sub>O<sub>3</sub>Na: 271.0807, found: 271.0807.

IR ( $\nu_{\max}$  cm<sup>-1</sup>): 3340-3150, 1737, 1693, 1603, 1523, 1431.

***N*-(3-(4-Hydroxy-5-oxo-2-thioxoimidazolidin-4-yl)propyl)-1*H*-pyrrole-2-carboxamide (4ac)**

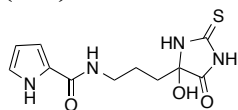

Diketopiperazine pyrrole-proline (**1a**) (76 mg, 0.4 mmol) was added to a solution of Bu<sub>2</sub>S (0.35 mL, 2.0 mmol, 5 eq.) in dry DMF (2.7 mL) and stirred in the presence of O<sub>2</sub> flow for 1 h. Thiourea (45.6 mg, 0.6 mmol, 1.5 eq.) and DBU (80  $\mu$ L, 0.6 mmol, 1.5 eq.) was added and the stirring was continued for 1 h. The solvent was evaporated in vacuo and the residue was purified by column chromatography using CH<sub>2</sub>Cl<sub>2</sub>/MeOH : 9/1 to afford **3ac** (62 mg, 55 % yield).

**<sup>1</sup>H NMR** (CD<sub>3</sub>OD, 300 MHz):  $\delta$  6.91 (dd,  $J$  = 1.5, 2.6 Hz, 1H), 6.78 (dd,  $J$  = 1.3, 3.8 Hz, 1H), 6.17 (dd,  $J$  = 2.6, 3.8 Hz, 1H), 3.36 (m, 2H), 1.92 (m, 2H), 1.68, 1.55 (2m, 2H).

**<sup>13</sup>C NMR** (CD<sub>3</sub>OD, 75 MHz):  $\delta$  182.5, 176.0, 162.5, 125.4, 121.4, 110.2, 108.8, 87.0, 38.4, 33.2, 23.1.

**HRMS ESI<sup>+</sup>**: [M+Na]<sup>+</sup>  $m/z$  calcd. for C<sub>11</sub>H<sub>14</sub>N<sub>4</sub>O<sub>3</sub>NaS: 305.0684, found: 305.0658.

**IR** ( $\nu_{\max}$  cm<sup>-1</sup>): 3600-3100, 1748, 1605, 1514, 1325, 1181.

***N*-(3-(3-Oxo-3,4,5,6-tetrahydropyrazin-2-yl)propyl)-1*H*-pyrrole-2-carboxamide (6aa)**

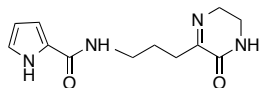

Diketopiperazine pyrrole-proline (**1a**) (770 mg, 4.05 mmol) was added to a solution of Bu<sub>2</sub>S (3.5 mL, 20.26 mmol, 5 eq.) in dry DMF (27 mL) and stirred in the presence of O<sub>2</sub> flow for 1 h. Ethylene diamine (1.1 mL, 16.2 mmol, 4 eq.) was added and the stirring was continued for 5 h. The solvent was evaporated in vacuo and the residue was purified by column chromatography using CH<sub>2</sub>Cl<sub>2</sub>/MeOH : 95/5 to afford **6aa** (753 mg, 75% yield).

**<sup>1</sup>H NMR** (CD<sub>3</sub>OD, 300 MHz):  $\delta$  6.90 (d,  $J$  = 2.6 Hz, 1H), 6.77 (d,  $J$  = 3.7 Hz, 1H), 6.16 (dd,  $J$  = 3.7, 2.6 Hz, 1H), 3.67 (t,  $J$  = 6.4 Hz, 2H), 3.37 (m, 4H), 2.64 (t,  $J$  = 7.5 Hz, 2H), 1.88 (m, 2H).

**<sup>13</sup>C NMR** (CD<sub>3</sub>OD, 75 MHz):  $\delta$  167.8, 163.8, 159.2, 126.9, 122.9, 111.6, 110.3, 48.4, 39.7, 39.4, 32.0, 27.4.

**HRMS ESI<sup>+</sup>**: [M+Na]<sup>+</sup>  $m/z$  calcd. for C<sub>12</sub>H<sub>16</sub>N<sub>4</sub>O<sub>2</sub>Na: 271.1171, found: 271.1165.

**IR** ( $\nu_{\max}$  cm<sup>-1</sup>): 3226, 2365, 1678, 1620, 1523, 1321, 1200, 734.

***N*-(3-(6-(1*H*-Indol-3-yl)-3-oxo-3,4,5,6-tetrahydropyrazin-2-yl)propyl)-1*H*-pyrrole-2-carboxamide (**6ab**)**

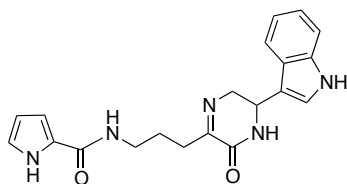

Diketopiperazine pyrrole-proline (**1a**) (200 mg, 1.05 mmol, 1 eq.) was added to a solution of Bu<sub>2</sub>S (0.9 mL, 5.26 mmol, 5 eq.) in dry DMF (27 mL) and stirred in the presence of O<sub>2</sub> flow for 1 h. (3-Indolyl)-ethylene diamine dihydrochloride (324 mg, 1.31 mmol, 1.3 eq.) was dissolved in MeOH (10 mL) and stirred for 15 min in the presence of Amberlyst A-21 (1 g). Methanolic solution was filtered, evaporated in vacuo, the residue was dissolved in DMF (3 mL), added to reaction mixture and the stirring was continued for 15 h. The solvent was evaporated in vacuo and the residue was purified by silica gel chromatography using CH<sub>2</sub>Cl<sub>2</sub>/MeOH : 97/3 to afford **6ab** (125 mg, 33% yield).

**<sup>1</sup>H NMR** (CD<sub>3</sub>OD, 500 MHz):  $\delta$  7.61 (d,  $J$  = 8.0 Hz, 1H), 7.40 (d,  $J$  = 8.0 Hz, 1H), 7.14 (dd,  $J$  = 8.0 et 7.1 Hz, 1H), 7.14 (s, 1H), 7.06 (dd,  $J$  = 8.0 et 7.1 Hz, 1H), 6.91 (d,  $J$  = 2.6 Hz, 1H), 6.77 (d,  $J$  = 3.9 Hz, 1H), 6.17 (dd,  $J$  = 3.9, 2.6 Hz, 1H), 5.17 (dd,  $J$  = 8.4, 5.6 Hz, 1H), 3.65 (m, 2H), 3.44 (m, 1H), 2.74 (m, 1H), 1.97 (m, 1H).

**<sup>13</sup>C NMR** (CD<sub>3</sub>OD, 75 MHz):  $\delta$  167.2, 163.9, 159.5, 138.5, 127.3, 127.0, 123.9, 122.8, 122.7, 120.3, 119.7, 114.2, 112.6, 111.7, 110.2, 55.7, 45.0, 39.7, 31.9, 27.6.

**HRMS ESI<sup>+</sup>**: [M+Na]<sup>+</sup>  $m/z$  calcd. for C<sub>20</sub>H<sub>21</sub>N<sub>5</sub>O<sub>2</sub>Na: 386.1593, found: 386.1593.

**IR** ( $\nu_{\max}$  cm<sup>-1</sup>): 3259, 1676, 1623, 1327, 743.

***N*-(3-(3-Oxo-3,4-dihydroquinoxalin-2-yl)propyl)-1*H*-pyrrole-2-carboxamide (**6ac**)**

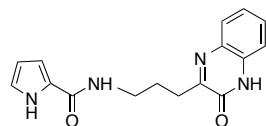

Diketopiperazine pyrrole-proline (**1a**) (50 mg, 0.26 mmol) was added to a solution of Bu<sub>2</sub>S (0.23 mL, 1.3 mmol, 5 eq.) in dry DMF (2 mL) and stirred in the presence of O<sub>2</sub> flow for 1 h. *o*-Phenyldiamine (57 mg, 0.53 mmol, 2 eq.) was added and the stirring was continued for 2 h at 80°C. The solvent was evaporated in vacuo and the residue was purified by preparative TLC using CH<sub>2</sub>Cl<sub>2</sub> (sat. with NH<sub>3</sub>)/MeOH : 95/5 to afford **6ac** (42 mg, 55% yield).

**<sup>1</sup>H NMR** (CD<sub>3</sub>OD, 500 MHz): δ 8.57 (s, 1H), 7.78 (dd, *J* = 7.9, 1.3 Hz, 1H), 7.50 (m, 1H), 7.32 (m, 2H), 7.04 (s, 1H), 6.92 (d, *J* = 2.6 Hz, 1H), 6.78 (d, *J* = 3.7 Hz, 1H), 6.15 (dd, *J* = 3.7, 2.6 Hz, 1H), 3.48 (t, *J* = 6.9 Hz, 2H), 2.98 (t, *J* = 7.4 Hz, 2H), 2.11 (m, 2H).

**<sup>13</sup>C NMR** (CD<sub>3</sub>OD, 75 MHz): δ 163.8, 162.5, 157.0, 133.9, 132.9, 130.9, 129.4, 127.1, 124.9, 122.7, 116.5, 111.6, 110.1, 39.9, 31.7, 27.6.

**HRMS ESI<sup>+</sup>**: [M+Na]<sup>+</sup> *m/z* calcd. for C<sub>16</sub>H<sub>16</sub>N<sub>4</sub>O<sub>2</sub>Na: 319.1171, found: 319.1167.

**IR** (ν<sub>max</sub> cm<sup>-1</sup>): 1639, 1590, 1533.

**(Z)-4-((1*H*-Indol-3-yl)methylene)-2-amino-1*H*-imidazol-5(4*H*)-one (7ca)**

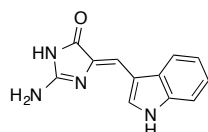

Diketopiperazine pyrrole-tryptophan (**1c**) (140 mg, 0.5 mmol, 1 eq.) was added to a solution of Ph<sub>3</sub>P (395 mg, 1.5 mmol, 3 eq.) in dry DMF (14 mL) and stirred in the presence of O<sub>2</sub> flow for 3 h. Guanidine carbonate (180 mg, 1.0 mmol, 2 eq.) was added and the stirring was continued for 1h at 80°C. The solvent was evaporated in vacuo and the residue was purified by column chromatography using CH<sub>2</sub>Cl<sub>2</sub>/MeOH : 85/15 to afford **7ca** (24 mg, 20% yield).

**<sup>1</sup>H NMR** (DMSO-*d*<sub>6</sub>, 300 MHz): δ 11.54 (s, 1H), 10.23 (br s, 1H), 8.05 (br s, 1H), 7.85 (d, *J* = 6.7 Hz, 1H), 7.42 (d, *J* = 6.7 Hz, 1H), 7.12 (m, 2H), 6.93 (br s, 2H), 6.65 (s, 1H).

**<sup>13</sup>C NMR** (DMSO-*d*<sub>6</sub>, 75 MHz): δ 181.5 (HMBC), 174.1 (HMBC), 135.8, 128.6 (HMQC), 126.8, 121.8, 121.7, 119.7, 118.5, 111.8, 110.7, 105.4 (HMQC).

**<sup>15</sup>N** (DMSO-*d*<sub>6</sub>, 60.8 MHz): δ 69.3 (NH<sub>2</sub>-6), 139.4 (NH-10), 141.5 (NH-1).

**HRMS ESI<sup>+</sup>**: [M+H]<sup>+</sup> *m/z* calcd. for C<sub>12</sub>H<sub>11</sub>N<sub>4</sub>O 227.0933, found: 227.0920.

**IR** (ν<sub>max</sub> cm<sup>-1</sup>): 3393, 3237, 3036, 1659, 1623, 1491.

**Ethyl 2-(1*H*-indol-3-yl)-2-(1*H*-pyrrole-2-carboxamido)acetate (Ab)**

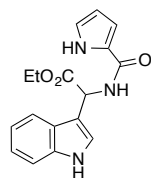

To a mixture of 1*H*-pyrrole-2-carboxylic acid (3.47 g, 31.2 mmol, 1 eq.) and indolyglycine (6.94 g, 31.2 mmol, 1 eq.) in dry DCM (90 mL) was added EDCI (6.53 g, 34.4 mmol, 1.1 eq.) and DMAP (191 mg, 1.56 mmol, 5% mol) at 0°C. The reaction mixture was stirred at room temperature during 12 h and then concentrated in dry. The residue was dissolved in EtOAc

(300 mL) and washed successively with H<sub>2</sub>O, 1N HCl, saturated aq. NaHCO<sub>3</sub> and brine. The organic layer was dried on MgSO<sub>4</sub>, the solvent was evaporated and the residue was purified by flash chromatography using heptane/EtOAc : 7/3 to give **Ab** (8.73g, 90% yield).

**<sup>1</sup>H NMR** (CDCl<sub>3</sub>, 300 MHz):  $\delta$  9.77 (s, 1H), 8.36 (s, 1H), 7.78 (d,  $J$  = 7.8 Hz, 1H), 7.35 (d,  $J$  = 7.8 Hz, 1H), 7.23 (dd,  $J$  = 2.4 et 7.8 Hz, 1H), 7.17 (dd,  $J$  = 2.4, 7.8 Hz, 1H), 7.15 (s, 1H), 6.85 (d,  $J$  = 3.5 Hz, 1H), 6.83 (s, 1H), 6.62 (d,  $J$  = 3.9 Hz, 1H), 6.19 (dd,  $J$  = 3.5, 3.9 Hz, 1H), 6.00 (d,  $J$  = 6.9 Hz, 1H), 4.22 (m, 2H), 1.22 (t,  $J$  = 7.5 Hz, 3H).

**<sup>13</sup>C NMR** (CDCl<sub>3</sub>, 75 MHz):  $\delta$  171.6, 160.9, 136.5, 125.7, 125.3, 123.9, 122.8, 122.1, 120.4, 119.3, 111.7, 111.3, 110.1, 110.0, 61.9, 50.0, 14.2.

**HRMS ESI<sup>+</sup>** [M+Na]<sup>+</sup>  $m/z$  calcd. for C<sub>17</sub>H<sub>17</sub>N<sub>3</sub>O<sub>3</sub>Na 334.1168, found: 334.1155.

**IR** ( $\nu_{\max}$  cm<sup>-1</sup>): 3270, 2359, 1724, 1620, 1503, 1337, 1232, 1182, 1111, 737.

### 3-(1*H*-Indol-3-yl)-2,3-dihydropyrrolo[1,2-*a*]pyrazine-1,4-dione (**1b**)

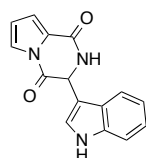

Ethyl ester **Ab** (500 mg, 1.6 mmol, 1 eq.) was dissolved in degassed anhydrous THF (45 mL) and cooled to 0°C. Sodium hydride (57 mg, 2.4 mmol, 1.5 eq.) was added and the mixture was stirred at 0°C for 10 minutes and then at room temperature for 3 h. After the completion of the reaction, the mixture was poured into phosphate buffer pH 3.8 (90 mL) and quickly extracted with EtOAc. The organic layer was dried on MgSO<sub>4</sub>, the solvent was evaporated and the residue was purified by flash chromatography using heptane/EtOAc : 45/55 to give diketopiperazine **1b** (275.6 mg, 65% yield).

**<sup>1</sup>H NMR** (acetone *d*<sub>6</sub>, 300 Hz):  $\delta$  10.43 (s, 1H), 7.59 (s, 1H), 7.54 (d,  $J$  = 3.3 Hz, 1H), 7.45 (m, 3H), 7.16 (t,  $J$  = 7.8 Hz, 1H), 7.10 (d,  $J$  = 3.3 Hz, 1H), 7.02 (t,  $J$  = 7.8 Hz, 1H), 6.63 (t,  $J$  = 3.3 Hz, 1H), 5.94 (s, 1H).

**<sup>13</sup>C NMR** (acetone *d*<sub>6</sub>, 125 MHz):  $\delta$  164.7, 156.9, 138.1, 126.6, 125.5, 122.9, 122.4, 120.5, 120.1, 119.6, 118.5, 118.1, 115.8, 112.8, 56.3.

**HRMS ESI<sup>-</sup>** [M-H]<sup>-</sup>  $m/z$  calcd. for C<sub>15</sub>H<sub>10</sub>N<sub>3</sub>O<sub>2</sub> 264.0773, found: 264.0765.

**IR** ( $\nu_{\max}$   $\text{cm}^{-1}$ ): 3228, 2362, 1718, 1654, 1413, 1334, 740.

### 3-(1*H*-Indol-3-yl)-5,6-dihydropyrazin-2(1*H*)-one (8ba)

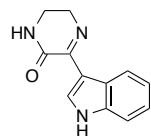

Diketopiperazine pyrrole-indolylglycine (**1b**) (325 mg, 1.23 mmol, 1 eq.) was added to a solution of Bu<sub>2</sub>S (1.1 mL, 6.15 mmol, 5 eq.) in dry DMF (27 mL) and stirred in the presence of O<sub>2</sub> flow for 3 h. Ethylene diamine (0.33 mL, 4.92 mmol, 4 eq.) was added and the stirring was continued for 17 h. The solvent was evaporated in vacuo and the residue was purified by column chromatography using CH<sub>2</sub>Cl<sub>2</sub>/MeOH : 98/2 to afford **8ba** (57.6 mg, 22% yield).

**<sup>1</sup>H NMR** (acetone *d*<sub>6</sub>, 500 MHz):  $\delta$  10.59 (s, 1H), 8.54 (d,  $J$  = 7.3 Hz, 1H), 8.52 (s, 1H), 7.47 (d,  $J$  = 7.3 Hz, 2H), 7.18 (dd,  $J$  = 7.3, 5.9 Hz, 1H), 7.13 (dd,  $J$  = 7.3, 5.9 Hz, 1H), 3.90 (t,  $J$  = 6.3 Hz, 2H), 3.49 (t,  $J$  = 6.3 Hz, 2H).

**<sup>13</sup>C NMR** (acetone *d*<sub>6</sub>, 75 MHz):  $\delta$  158.9, 158.7, 137.3, 132.5, 127.4, 123.9, 123.1, 121.4, 113.0, 112.1, 48.6, 39.3.

**HRMS ESI<sup>+</sup>**: [M+H]<sup>+</sup>  $m/z$  calcd. for C<sub>12</sub>H<sub>12</sub>N<sub>3</sub>O 214.0980, found: 214.0974.

**IR** ( $\nu_{\max}$   $\text{cm}^{-1}$ ): 3218, 2358, 1659, 1580, 1426, 1339, 1122, 1010, 742.

### 3,6-Di(1*H*-indol-3-yl)-5,6-dihydropyrazin-2(1*H*)-one (8bb)

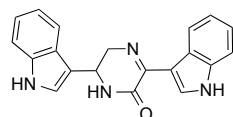

Diketopiperazine pyrrole-indolylglycine (**1b**) (318 mg, 1.2 mmol, 1 eq.) was added to a solution of Bu<sub>2</sub>S (1.0 mL, 6.0 mmol, 5 eq.) in dry DMF (27 mL) and stirred in the presence of O<sub>2</sub> flow for 3 h. (3-Indolyl)-ethylene diamine (280 mg, 1.6 mmol, 1.3 eq.) was added and the stirring was continued for 17 h. The solvent was evaporated in vacuo and the residue was purified by column chromatography using heptane/EtOAc : 15/85 to afford **8bb** (60.6 mg, 15% yield).

**<sup>1</sup>H NMR** (DMSO *d*<sub>6</sub>, 300 MHz):  $\delta$  11.51 (s, 1H), 11.04 (s, 1H), 8.76 (s, 1H), 8.42 (s, 1H), 8.39 (d,  $J$  = 7.5 Hz, 1H), 7.71 (d,  $J$  = 7.5 Hz, 1H), 7.45 (d,  $J$  = 7.5 Hz, 1H), 7.39 (d,  $J$  = 7.5 Hz, 1H), 7.30 (s, 1H), 7.16 (t,  $J$  = 7.5 Hz, 1H), 7.11 (t,  $J$  = 7.5 Hz, 1H), 7.09 (t,  $J$  = 7.5 Hz, 1H), 7.03 (t,  $J$  = 7.5 Hz, 1H), 4.99 (dd,  $J$  = 8.3, 5.1 Hz, 1H), 4.12 (m, 2H).

**$^{13}\text{C}$  NMR** (DMSO *d*<sub>6</sub>, 75 MHz):  $\delta$  158.4, 158.2, 136.9, 136.6, 132.4, 126.5, 126.1, 124.0, 123.1, 122.5, 121.9, 120.9, 119.5, 119.3, 113.3, 112.2, 112.1, 111.5, 54.0, 46.9.

**HRMS ESI<sup>+</sup>**:  $[\text{M}+\text{H}]^+$  *m/z* calcd. for C<sub>20</sub>H<sub>17</sub>N<sub>4</sub>O: 329.1402, found: 329.1406.

**IR** ( $\nu_{\text{max}}$  cm<sup>-1</sup>): 3228, 2360, 1660, 1581, 1417, 1333, 1244, 741.

***tert*-Butyl 3-(5-(1*H*-indol-3-yl)-6-oxo-1,2,3,6-tetrahydropyrazin-2-yl)-1*H*-indole-1-carboxylate (**8bd**)**

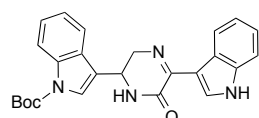

Diketopiperazine pyrrole-indolyglycine (**1b**) (318 mg, 1.2 mmol, 1 eq.) was added to a solution of Bu<sub>2</sub>S (1.0 mL, 6.0 mmol, 5 eq.) in dry DMF (27 mL) and stirred in the presence of O<sub>2</sub> flow for 3 h. *tert*-Butyl 3-(1,2-diaminoethyl)-1*H*-indole-1-carboxylate (440 mg, 1.6 mmol, 1.3 eq.) was added and the stirring was continued for 17 h. The solvent was evaporated in vacuo and the residue was purified by silica gel chromatography using CH<sub>2</sub>Cl<sub>2</sub>/MeOH : 97/3 to afford **8bd** (100 mg, 21% yield).

**$^1\text{H}$  NMR** (acetone *d*<sub>6</sub>, 500 MHz):  $\delta$  10.74 (s, 1H), 8.66 (m, 2H), 8.24 (d, *J* = 7.5 Hz, 1H), 7.86 (m, 2H), 7.68 (s, 1H), 7.51 (d, *J* = 7.5 Hz, 1H), 7.38 (t, *J* = 7.5 Hz, 1H), 7.29 (t, *J* = 7.5 Hz, 1H), 7.20 (t, *J* = 7.5 Hz, 1H), 7.12 (t, *J* = 7.5 Hz, 1H), 5.30 (dd, *J* = 10.9, 4.9 Hz, 1H), 3.94 (ddd, *J* = 12.8, 10.9, 2.1 Hz, 1H), 3.63 (dd, *J* = 12.8, 4.9 Hz, 1H), 1.74 (s, 9H).

**$^{13}\text{C}$  NMR** (acetone *d*<sub>6</sub>, 75 MHz):  $\delta$  159.0, 158.7, 150.5, 137.5, 136.9, 133.4, 127.5, 125.3, 124.5, 124.0, 123.4, 123.3, 122.1, 121.6, 120.8, 116.1, 112.9, 112.4, 112.3, 84.4, 55.1, 44.6, 28.3.

**HRMS ESI<sup>+</sup>**:  $[\text{M}+\text{H}]^+$  *m/z* calcd. for C<sub>25</sub>H<sub>25</sub>N<sub>4</sub>O<sub>3</sub>: 429.1927, found: 429.1928.

**IR** ( $\nu_{\text{max}}$  cm<sup>-1</sup>): 3244, 2340, 1670, 1568, 1368, 1153.



(Z)-N-(3-(2-amino-4-oxo-1H-imidazol-5(4H)-ylidene)propyl)-1H-pyrrole-2-carboxamide (3aa)

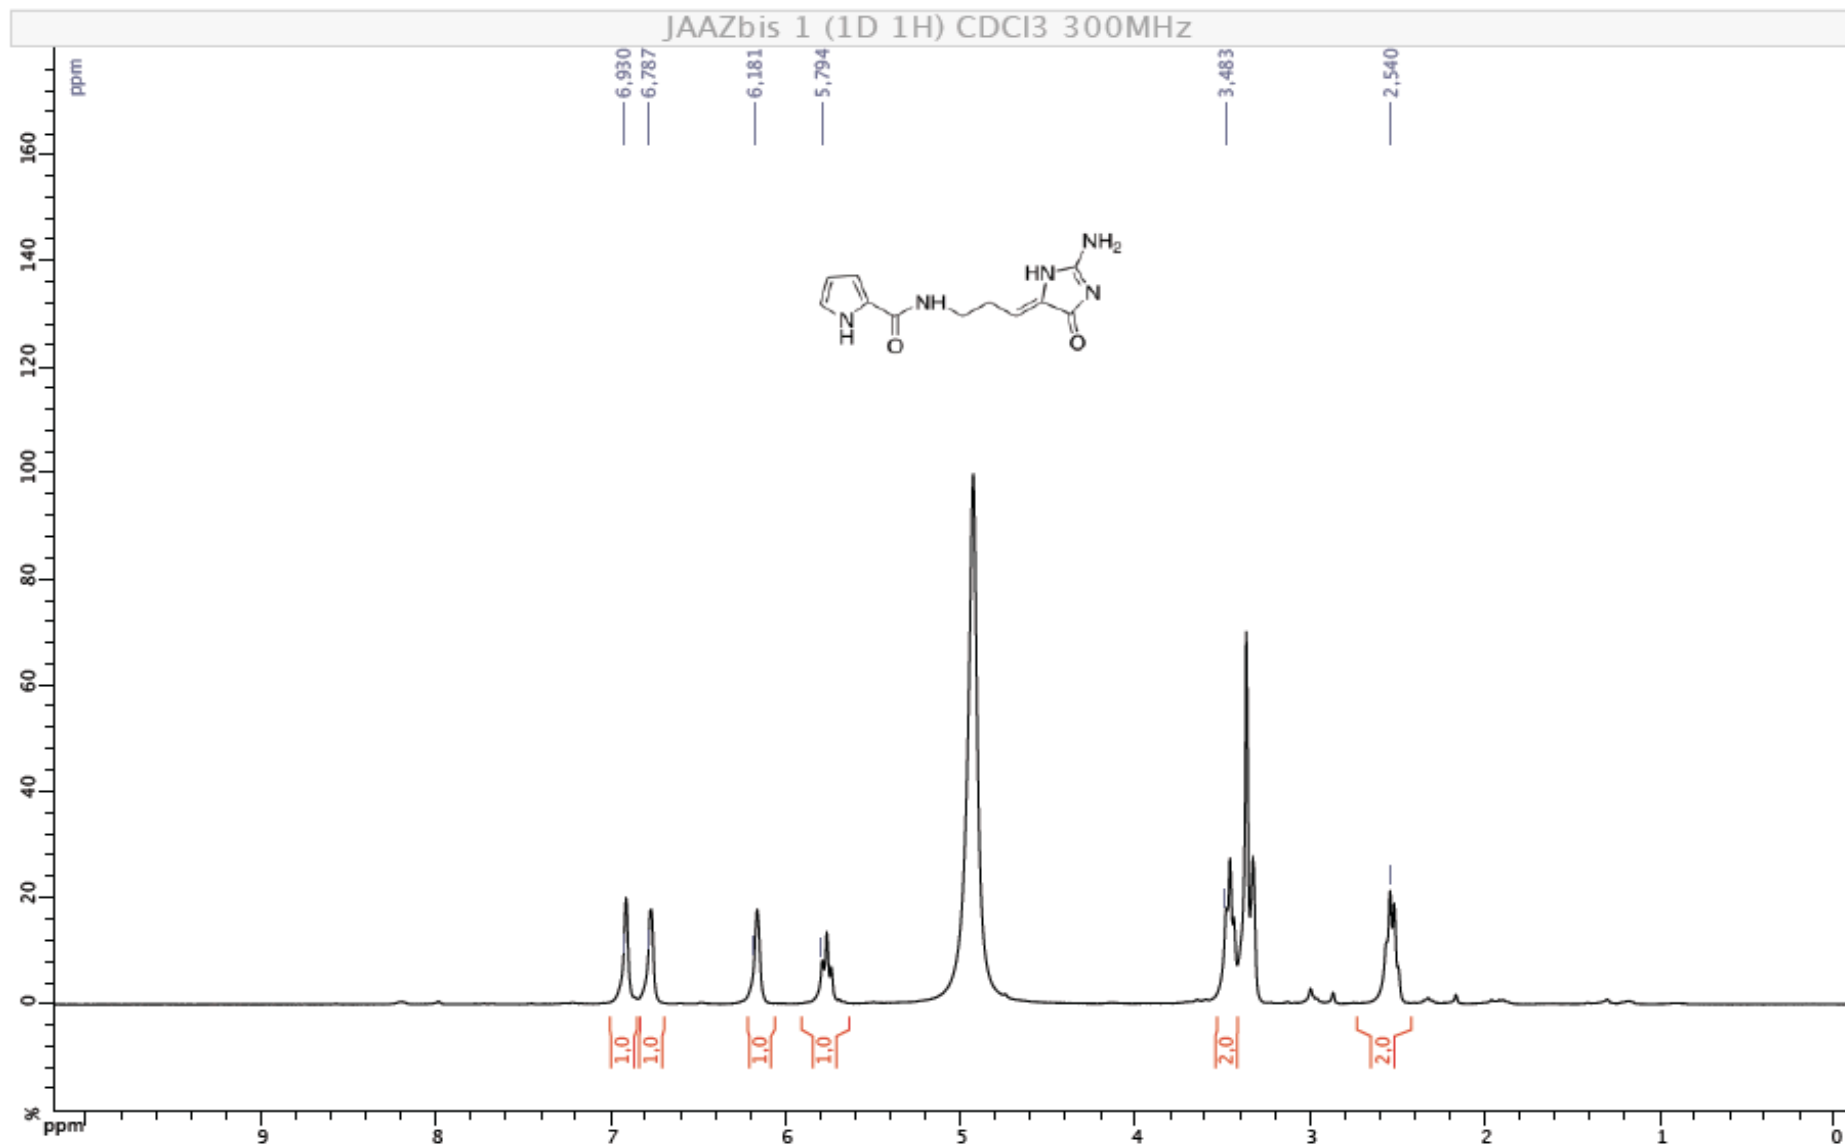

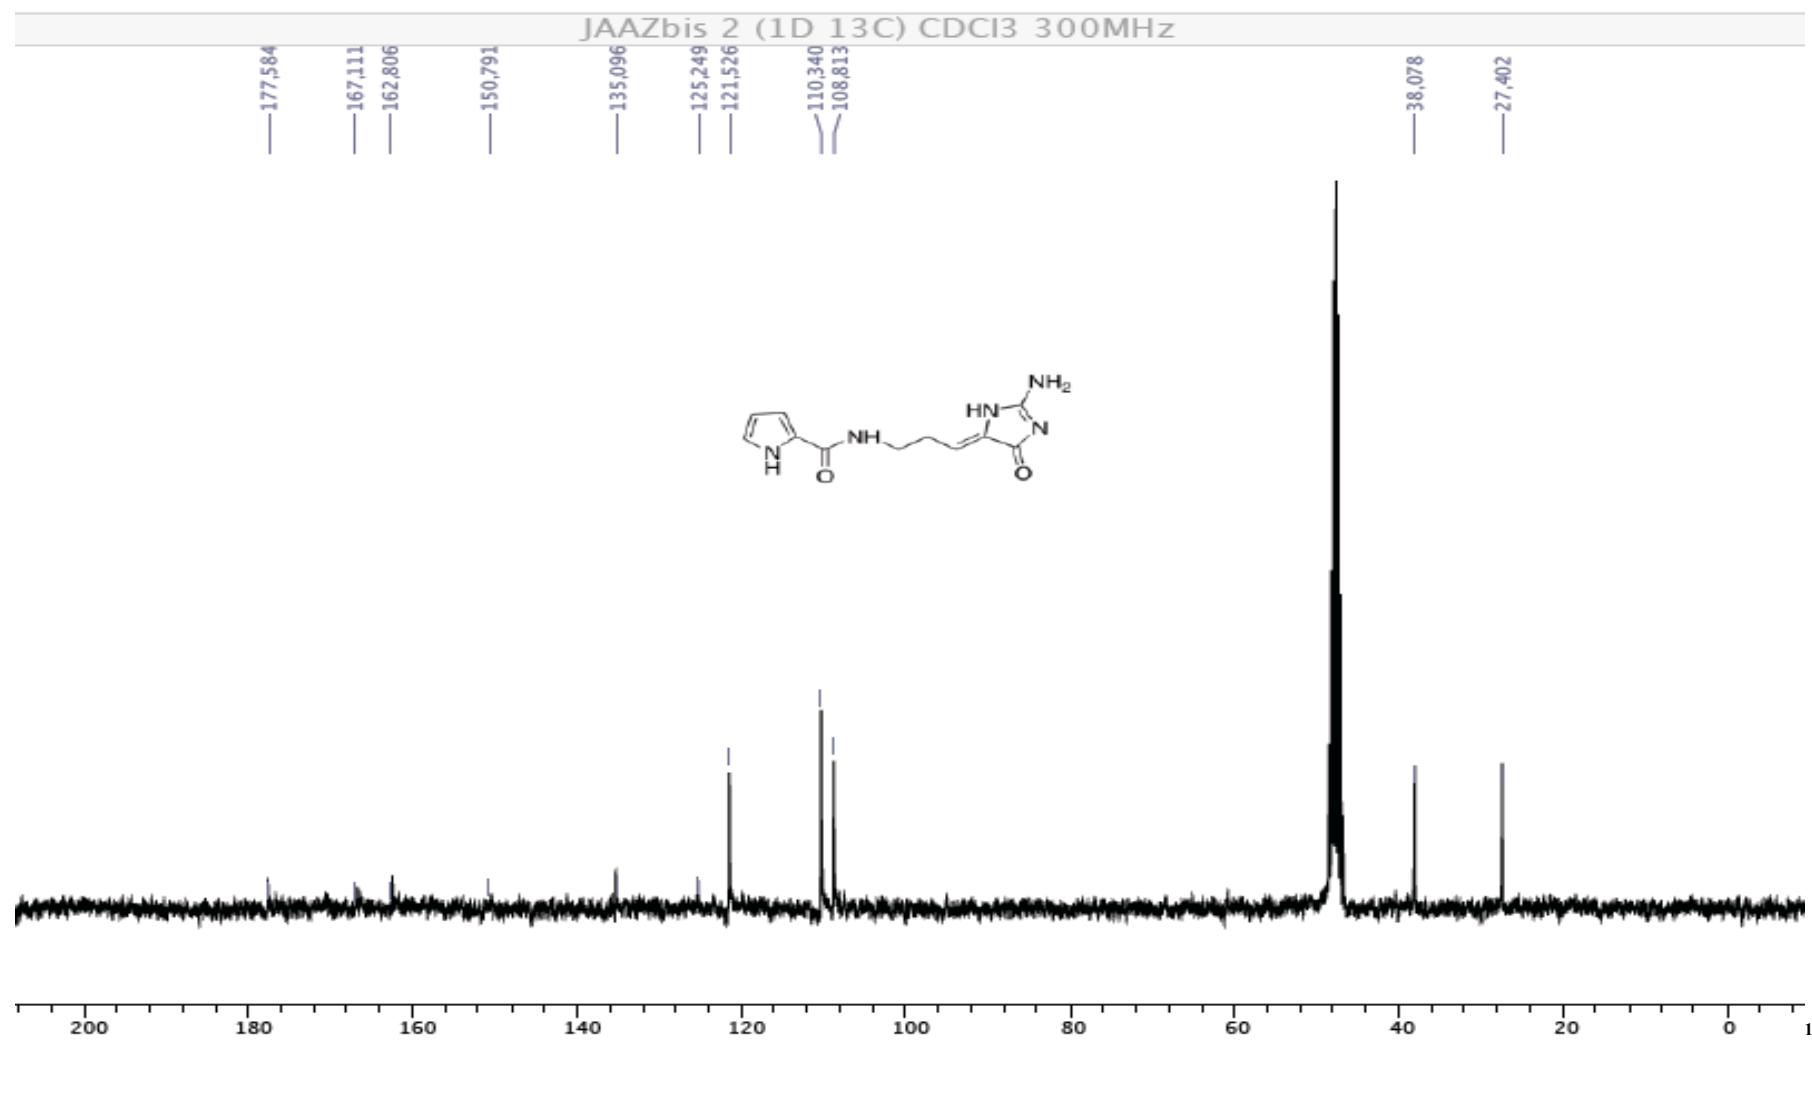

(Z)-N-(3-(2,5-Dioxoimidazolidin-4-ylidene)propyl)-1H-pyrrole-2-carboxamide (3ab)

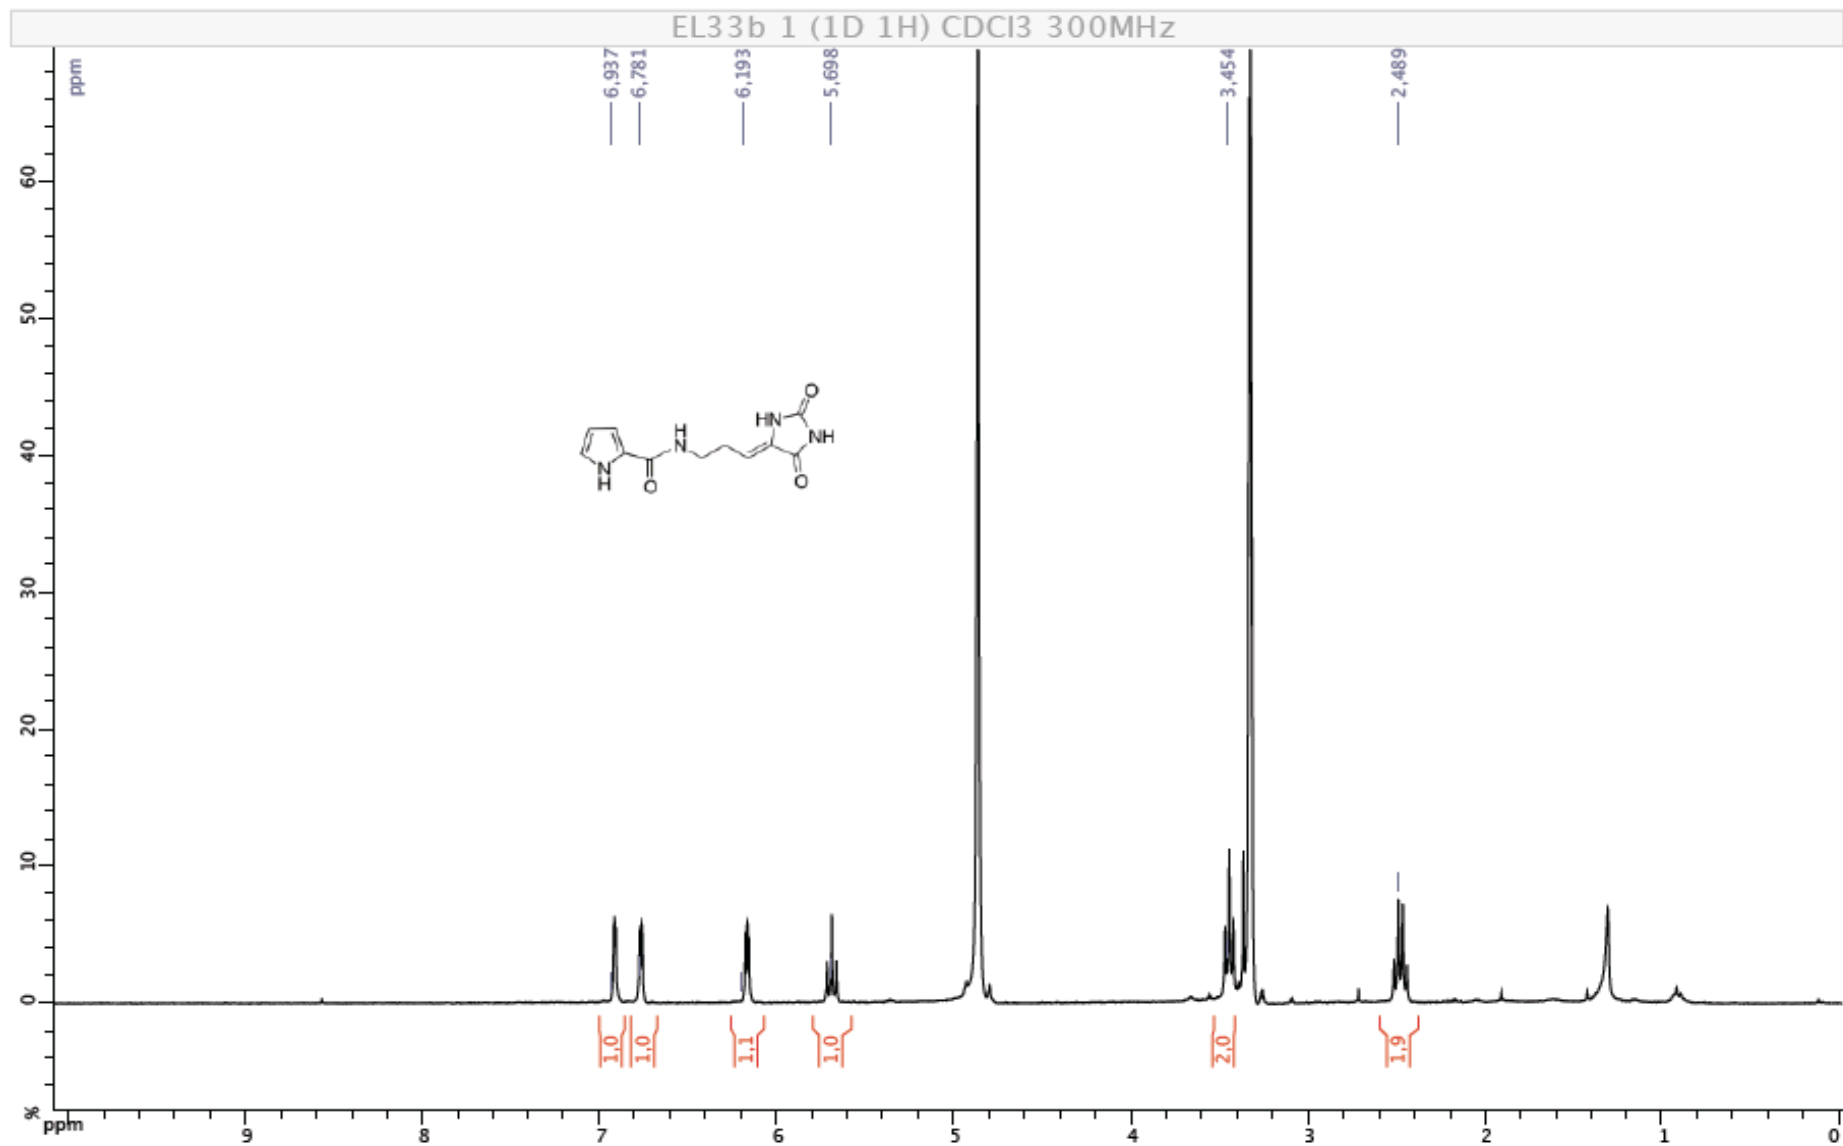

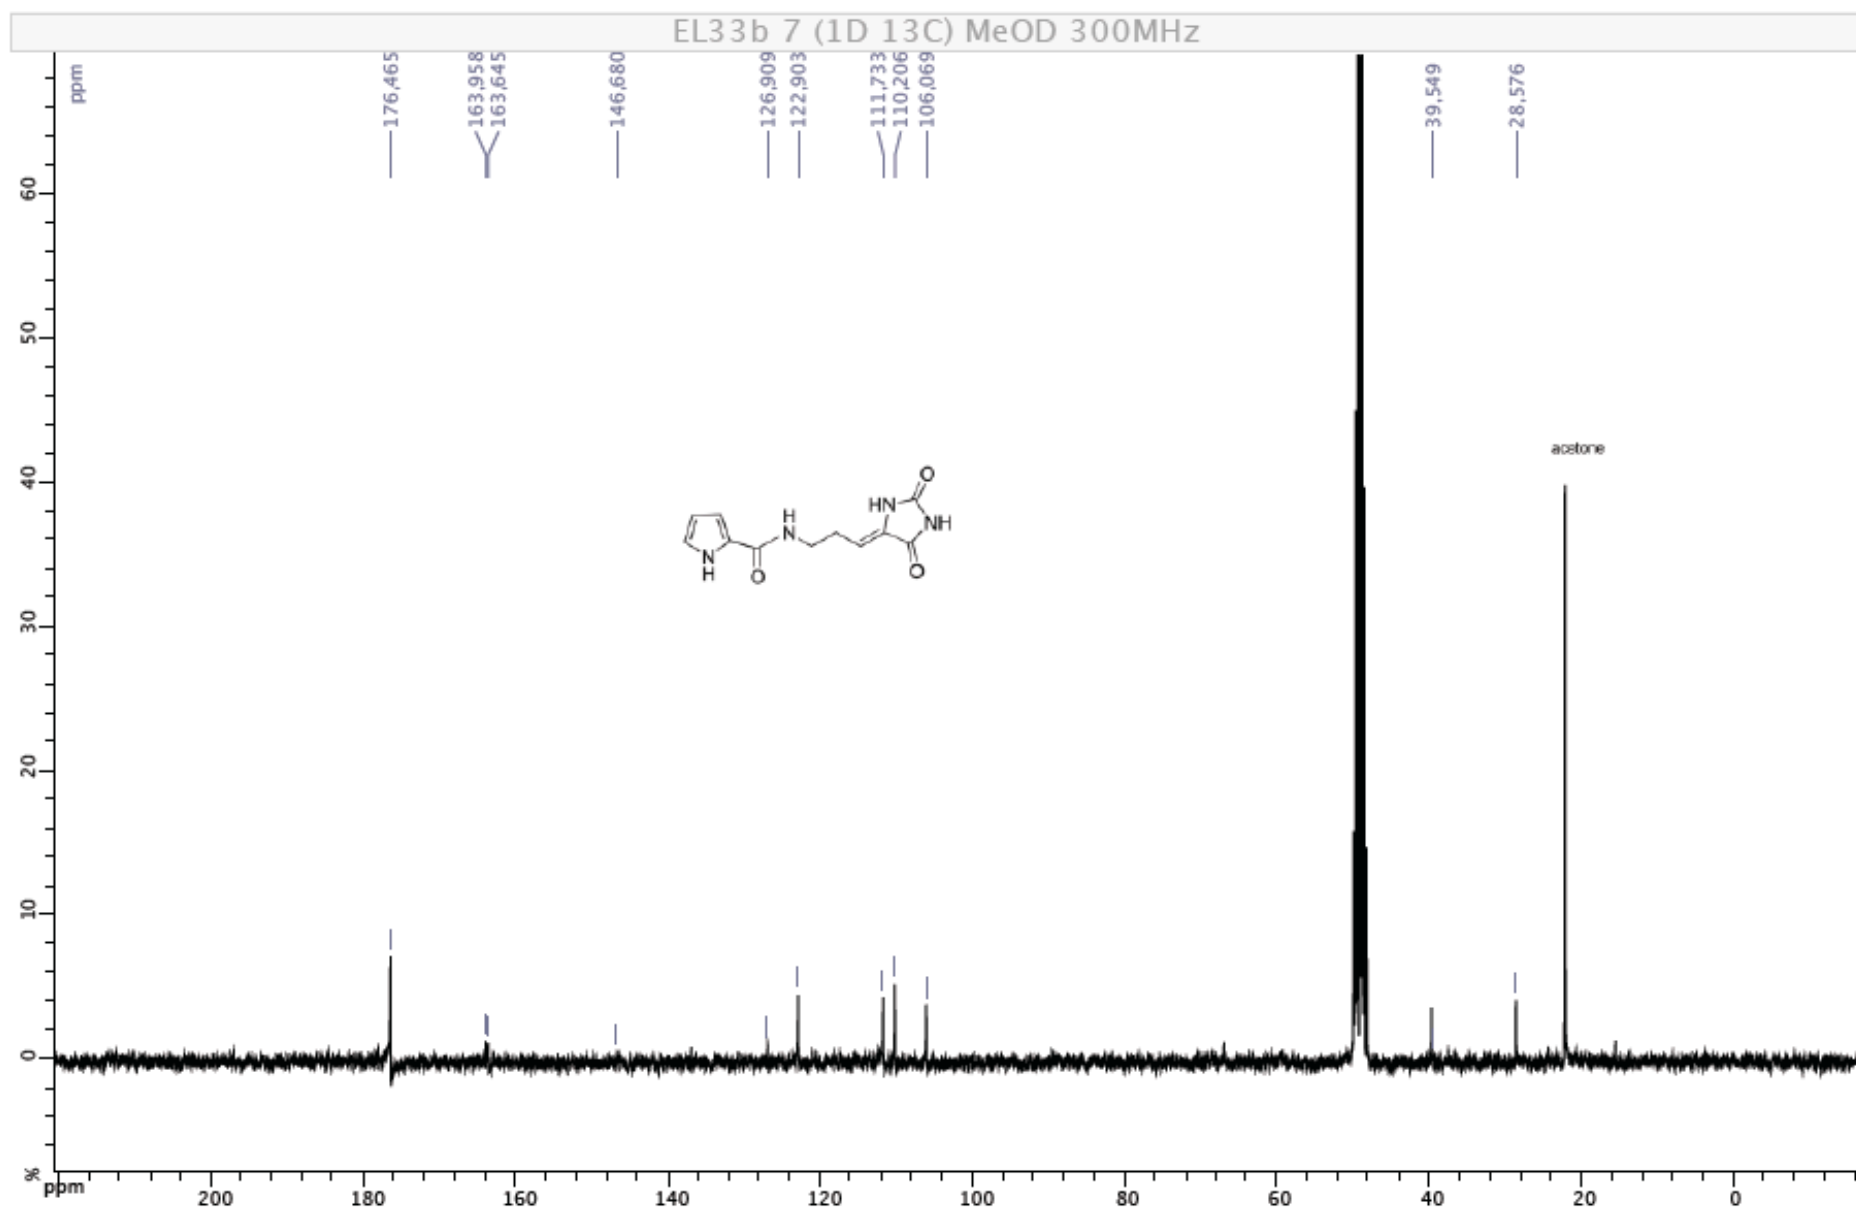

***N*-(3-(4-Hydroxy-5-oxo-2-thioxoimidazolidin-4-yl)propyl)-1*H*-pyrrole-2-carboxamide (4ac)**

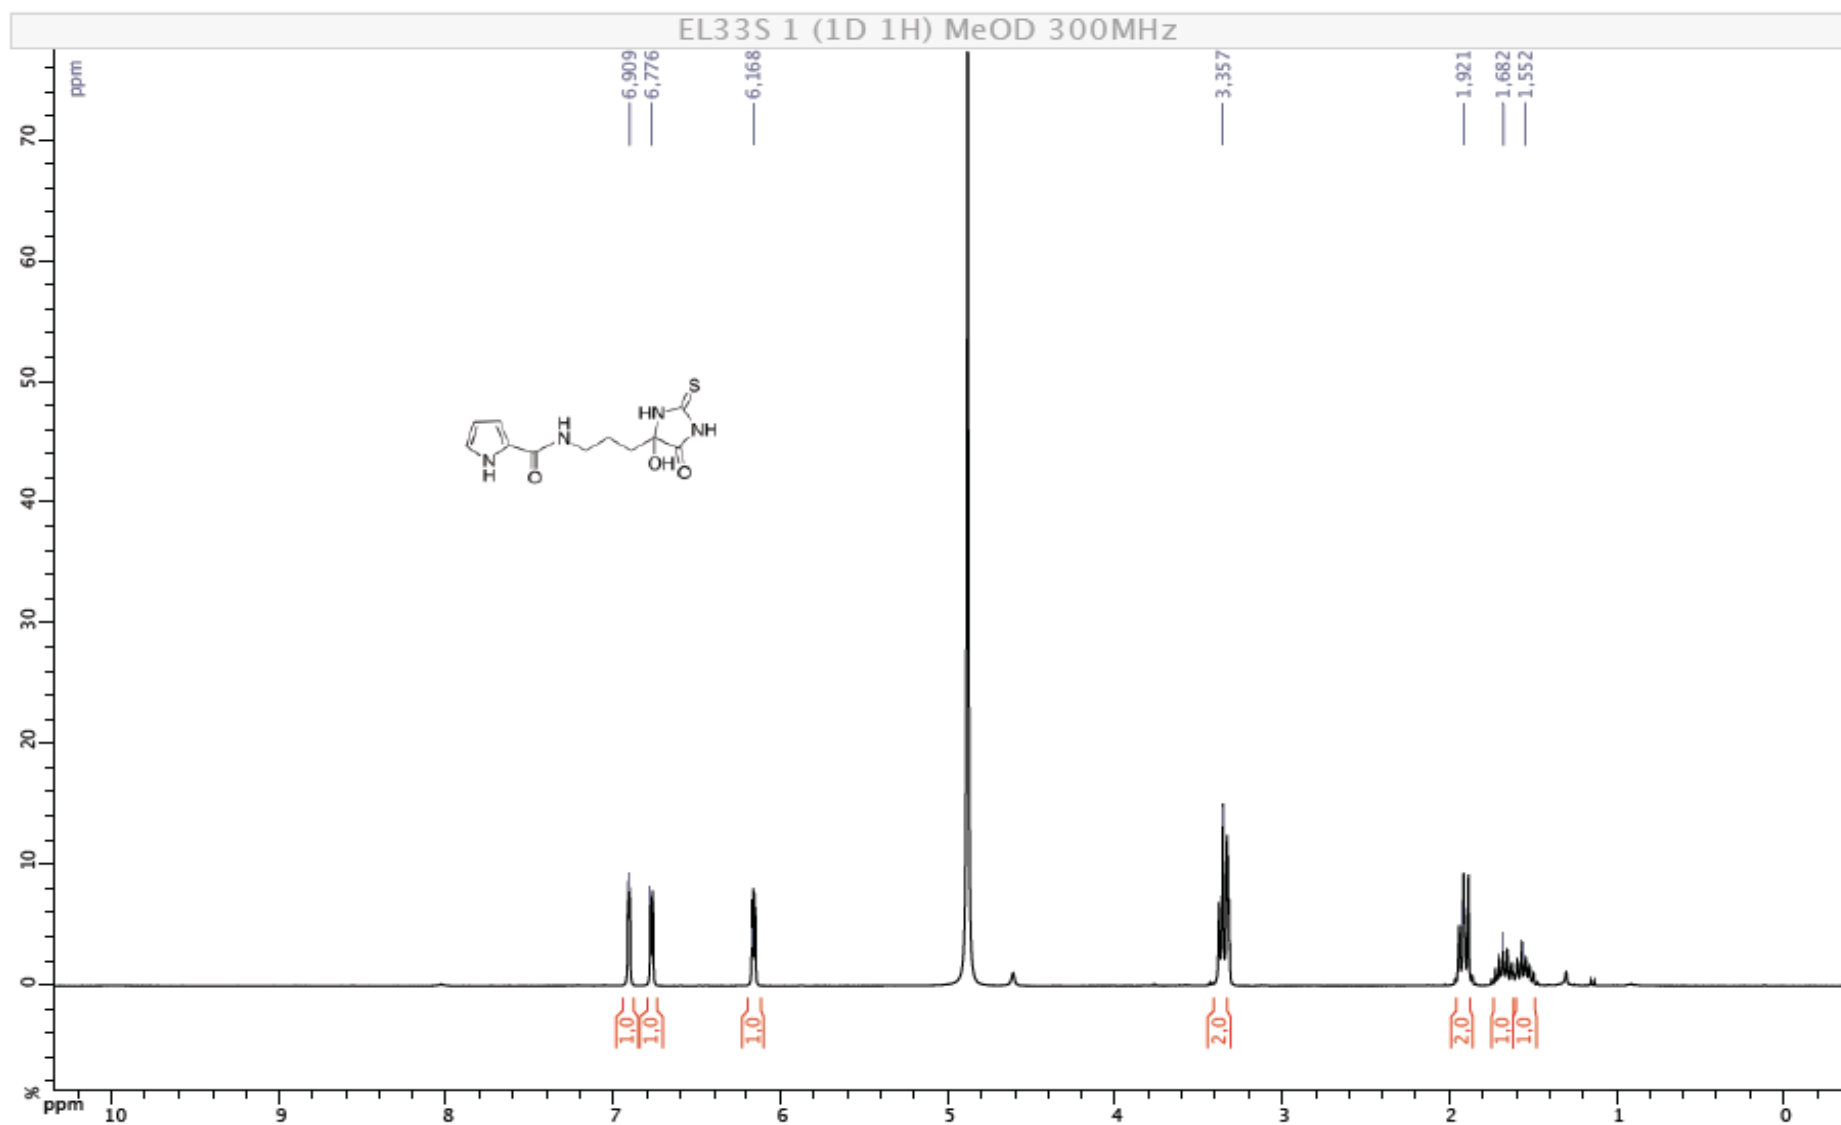

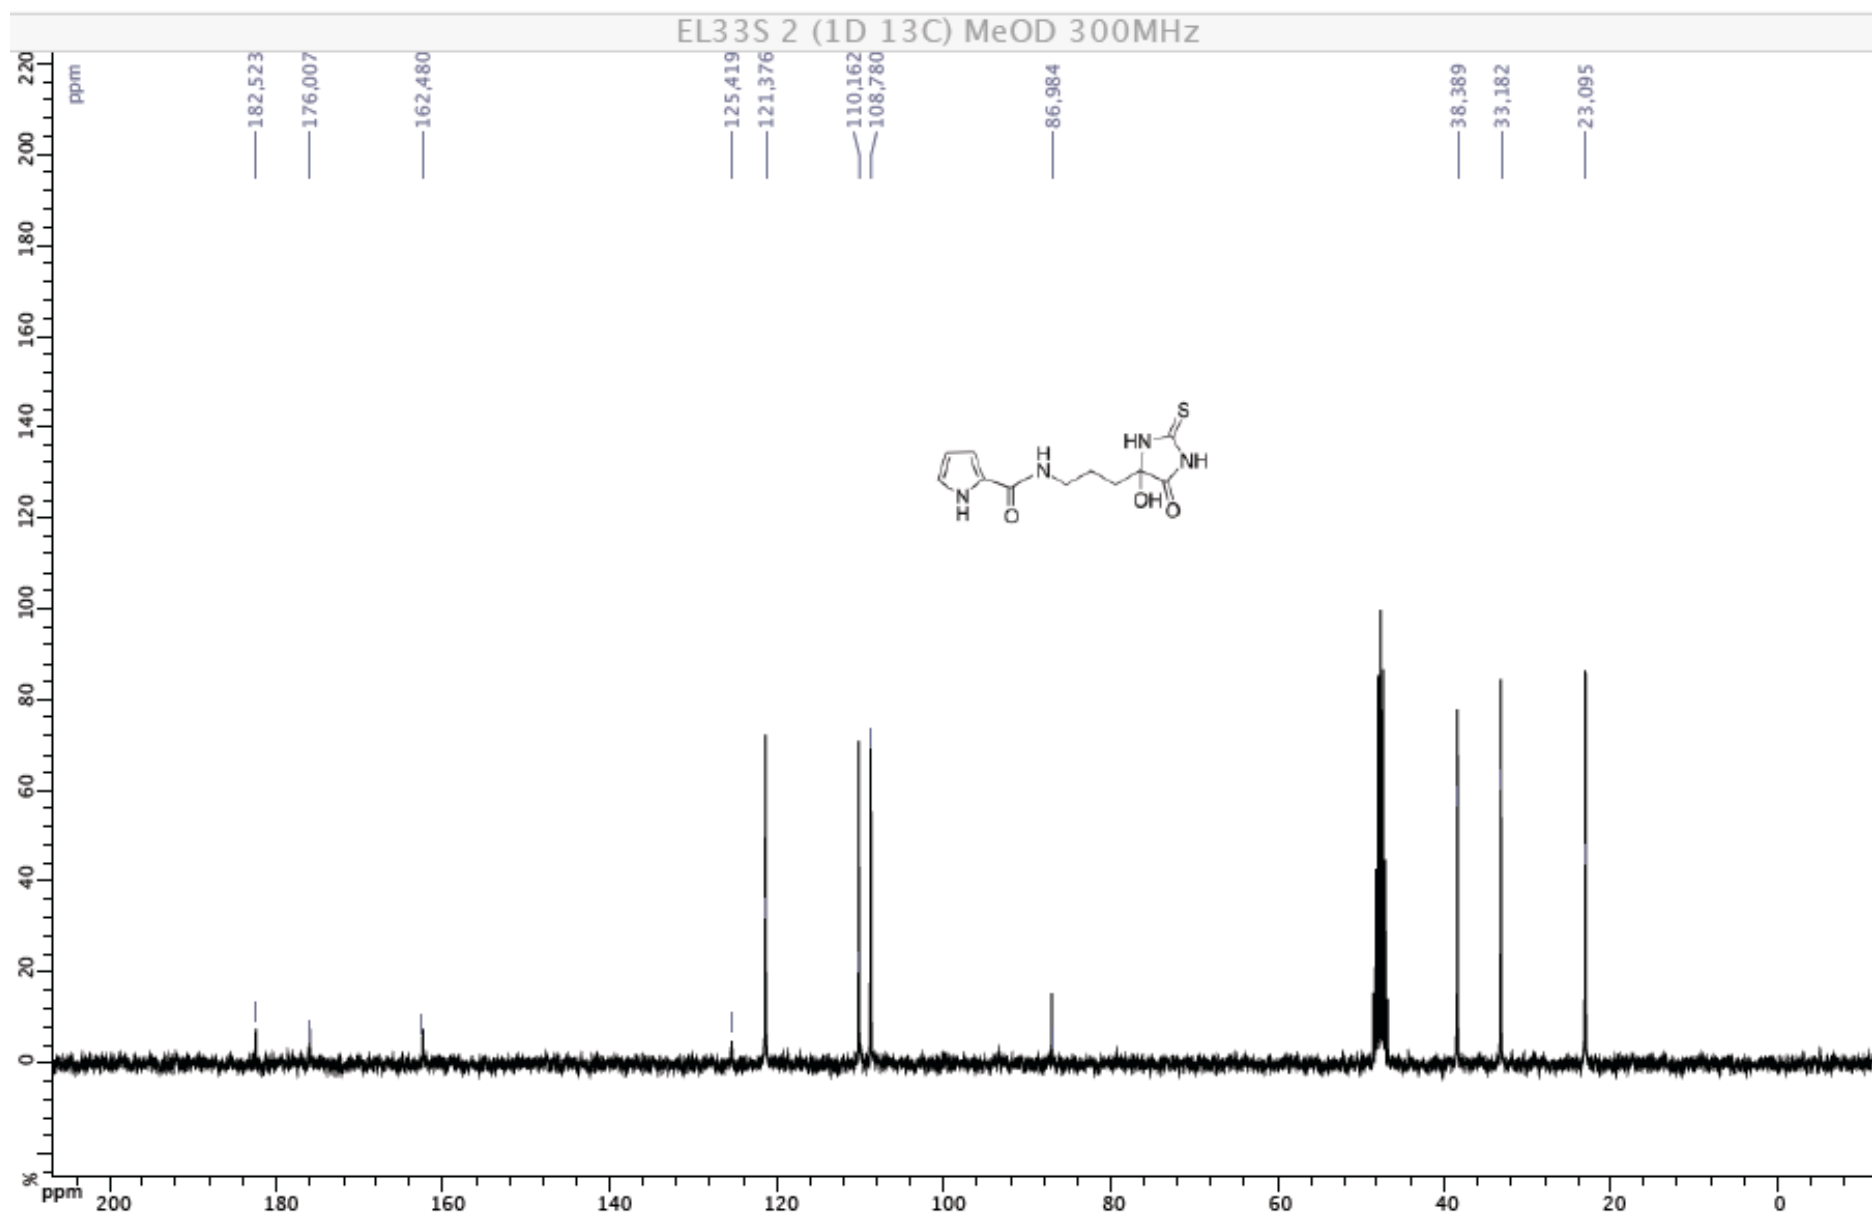

***N*-(3-(3-Oxo-3,4,5,6-tetrahydropyrazin-2-yl)propyl)-1*H*-pyrrole-2-carboxamide (6aa)**

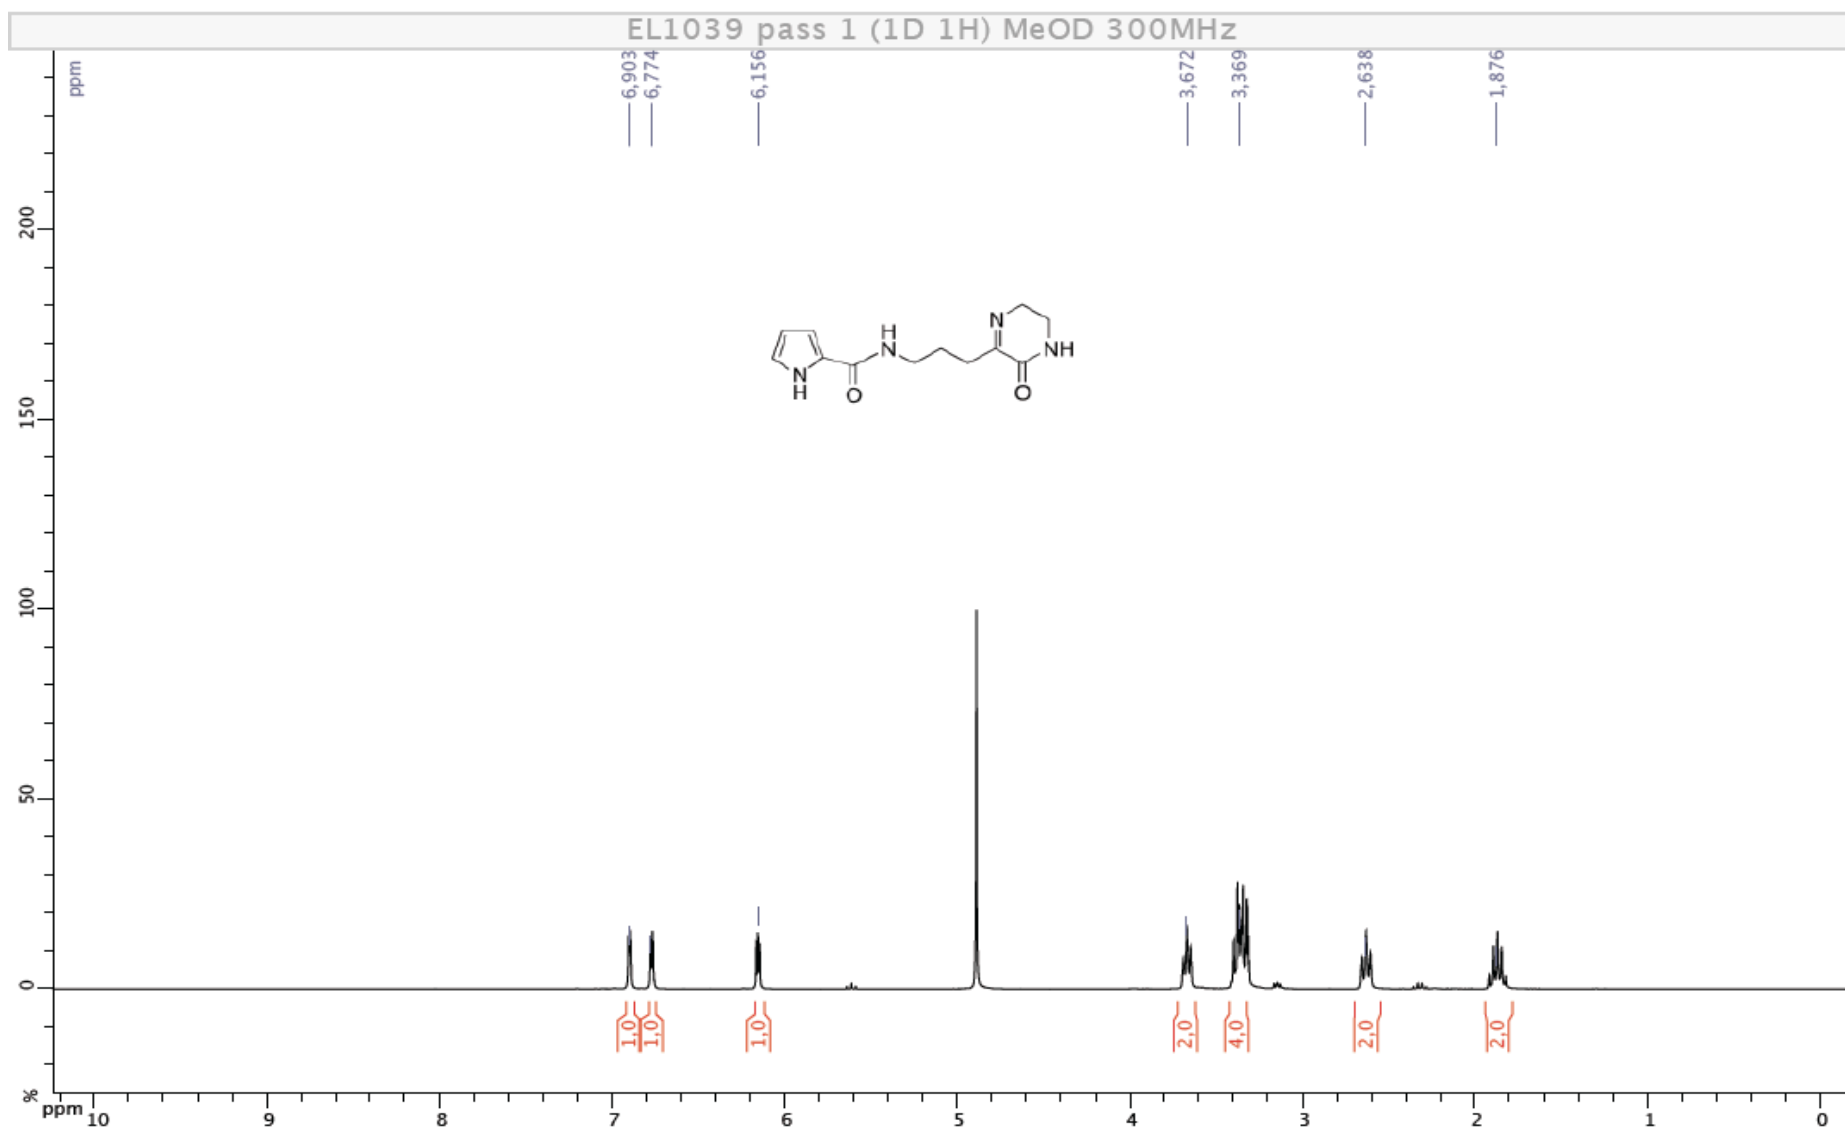

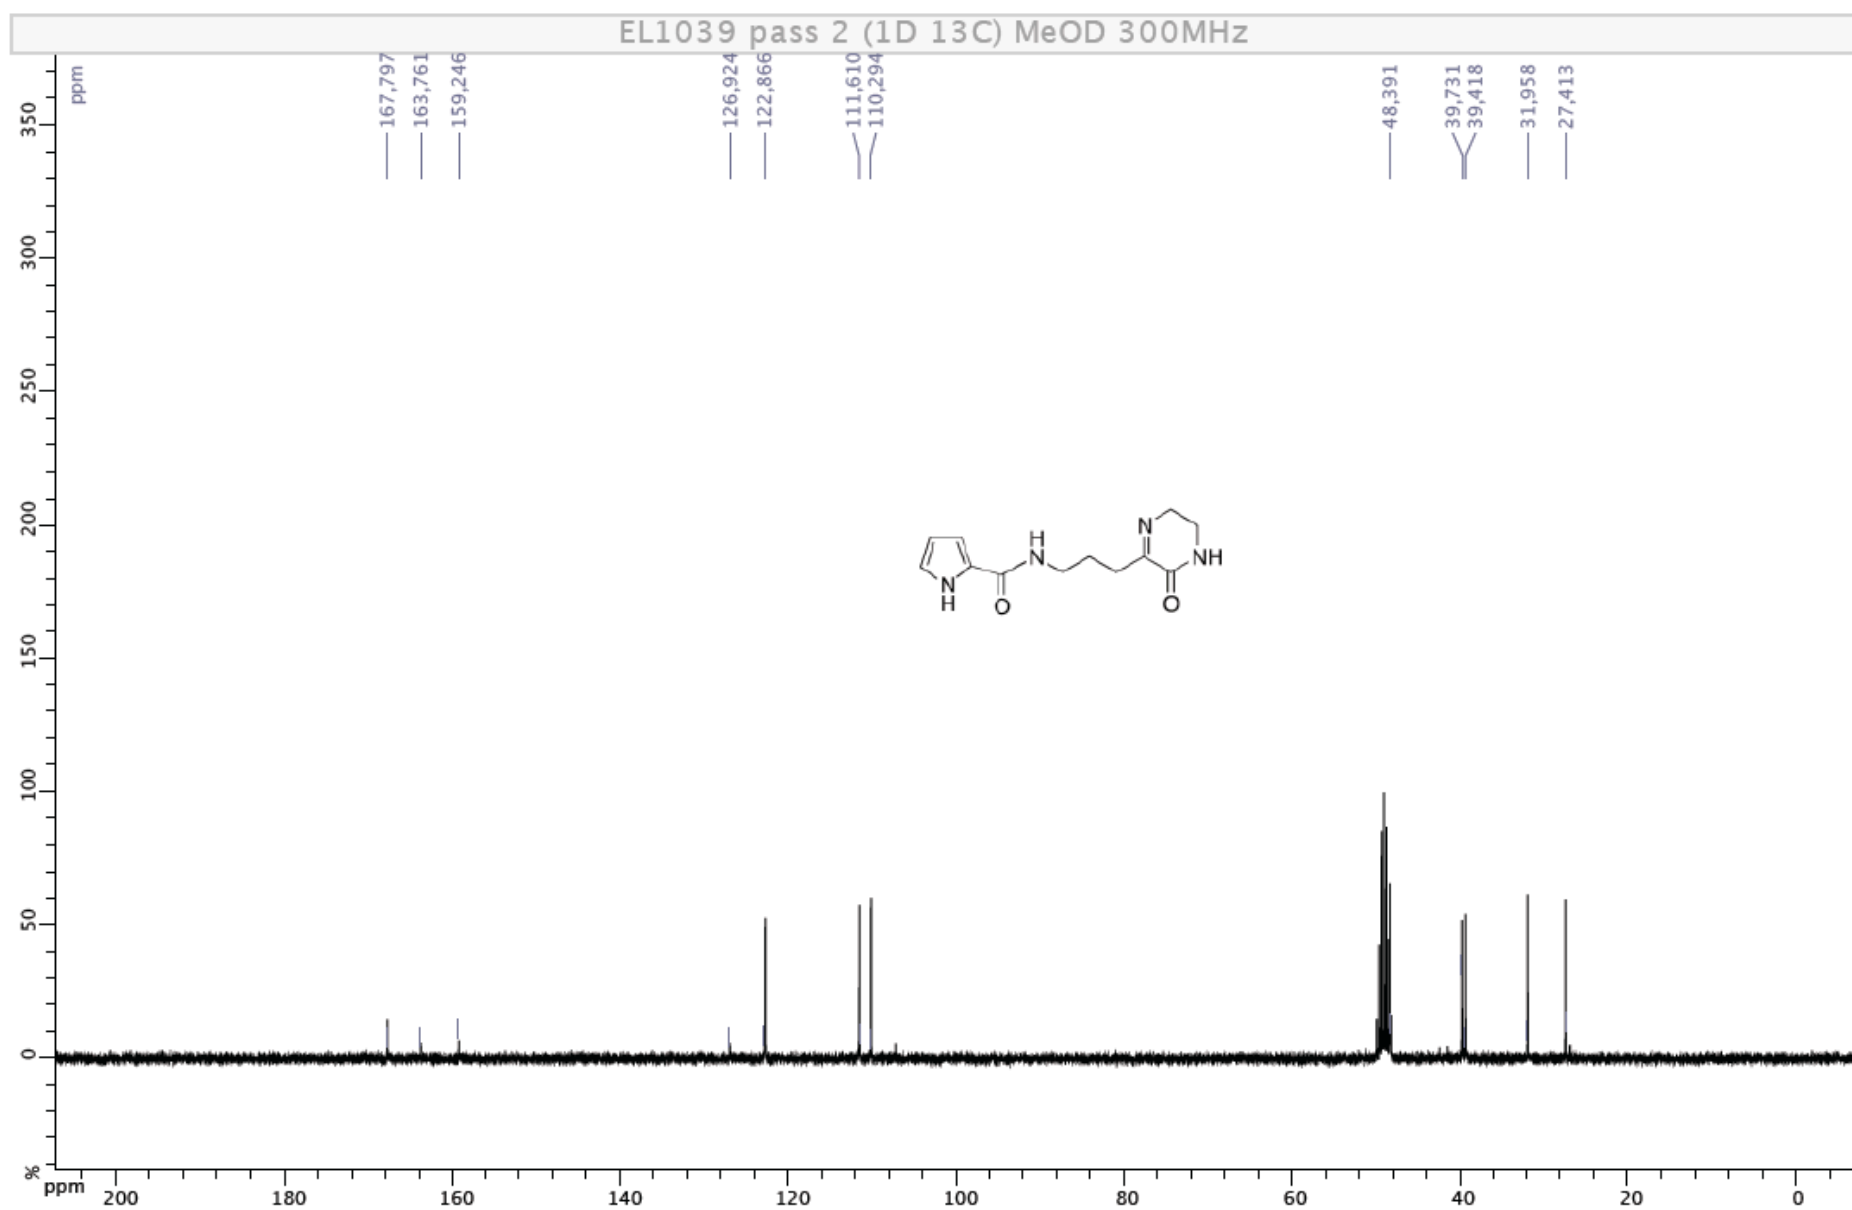



***N*-3-(6-(1*H*-Indol-3-yl)-3-oxo-3,4,5,6-tetrahydropyrazin-2-yl)propyl)-1*H*-pyrrole-2-carboxamide (6ab)**

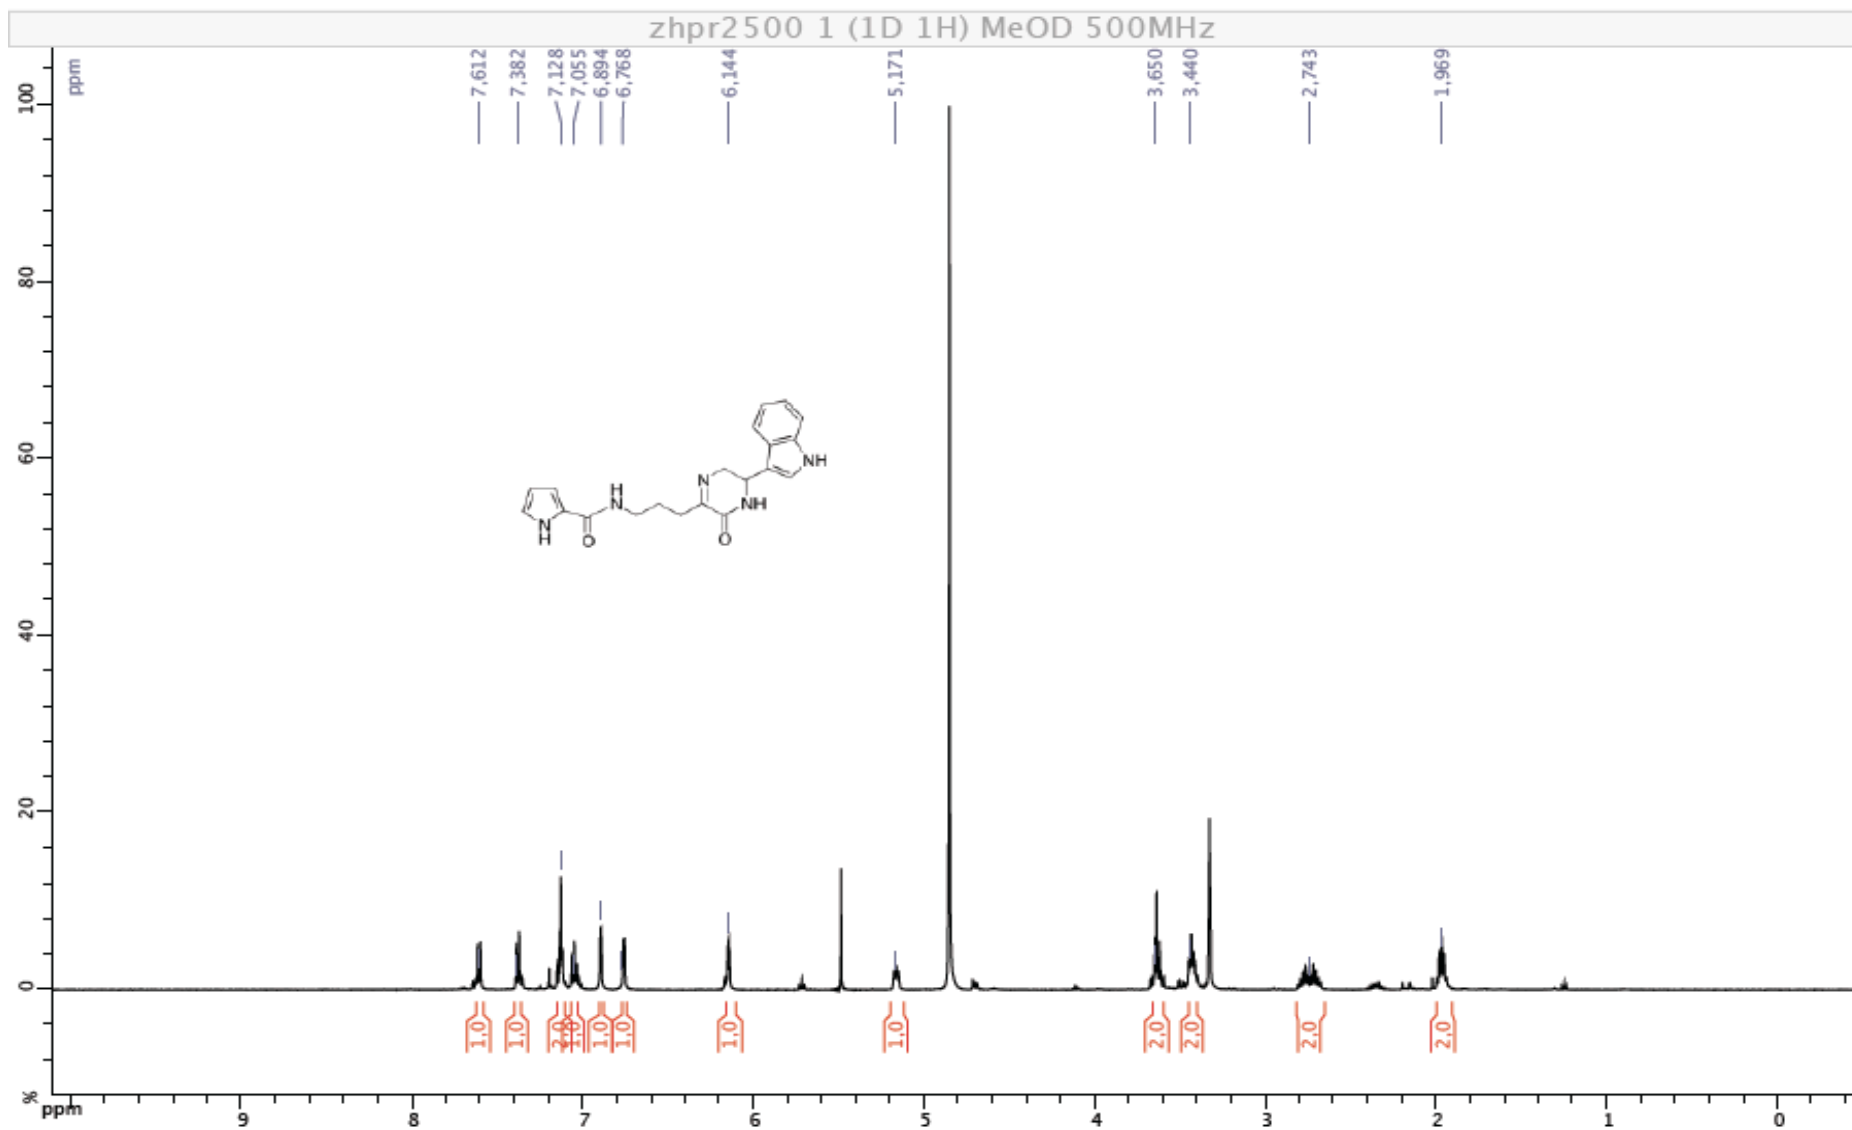

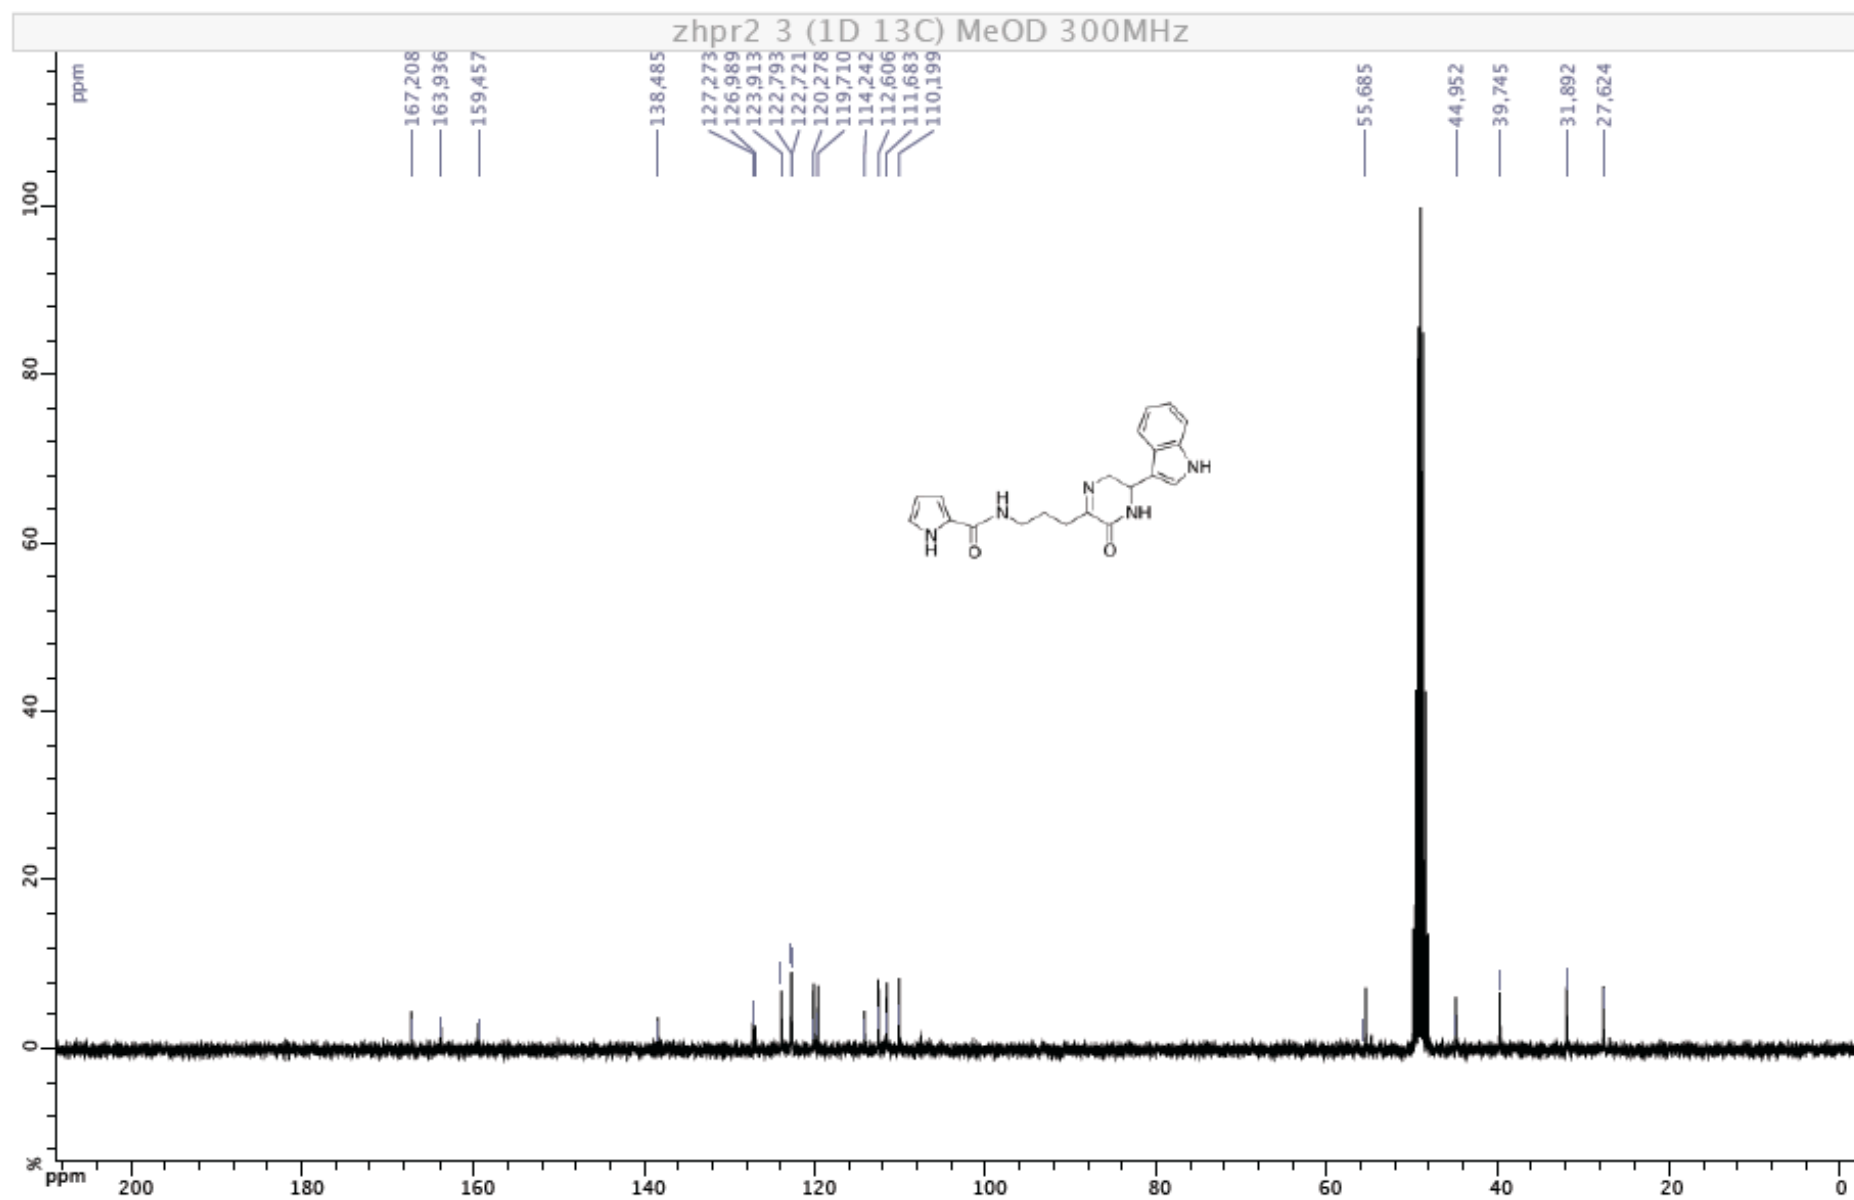

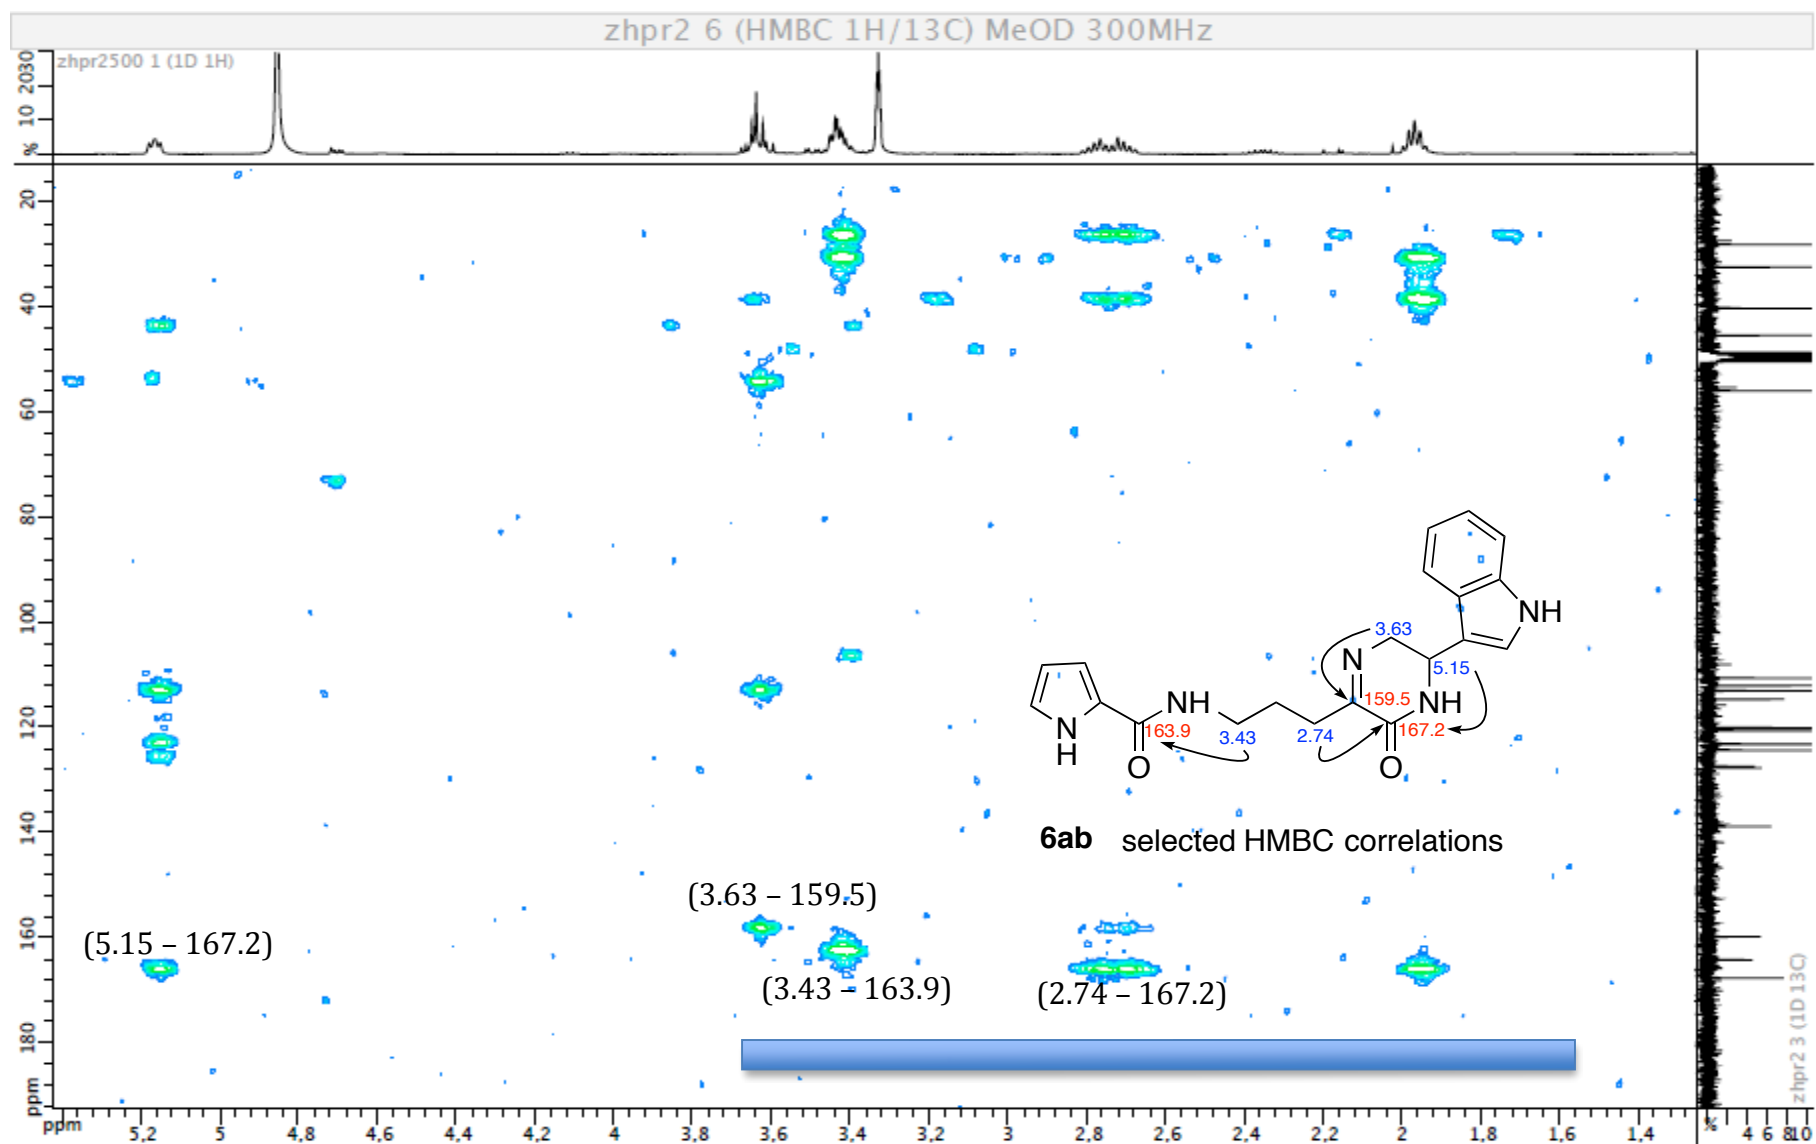

***N*-(3-(3-Oxo-3,4-dihydroquinoxalin-2-yl)propyl)-1*H*-pyrrole-2-carboxamide (6ac)**

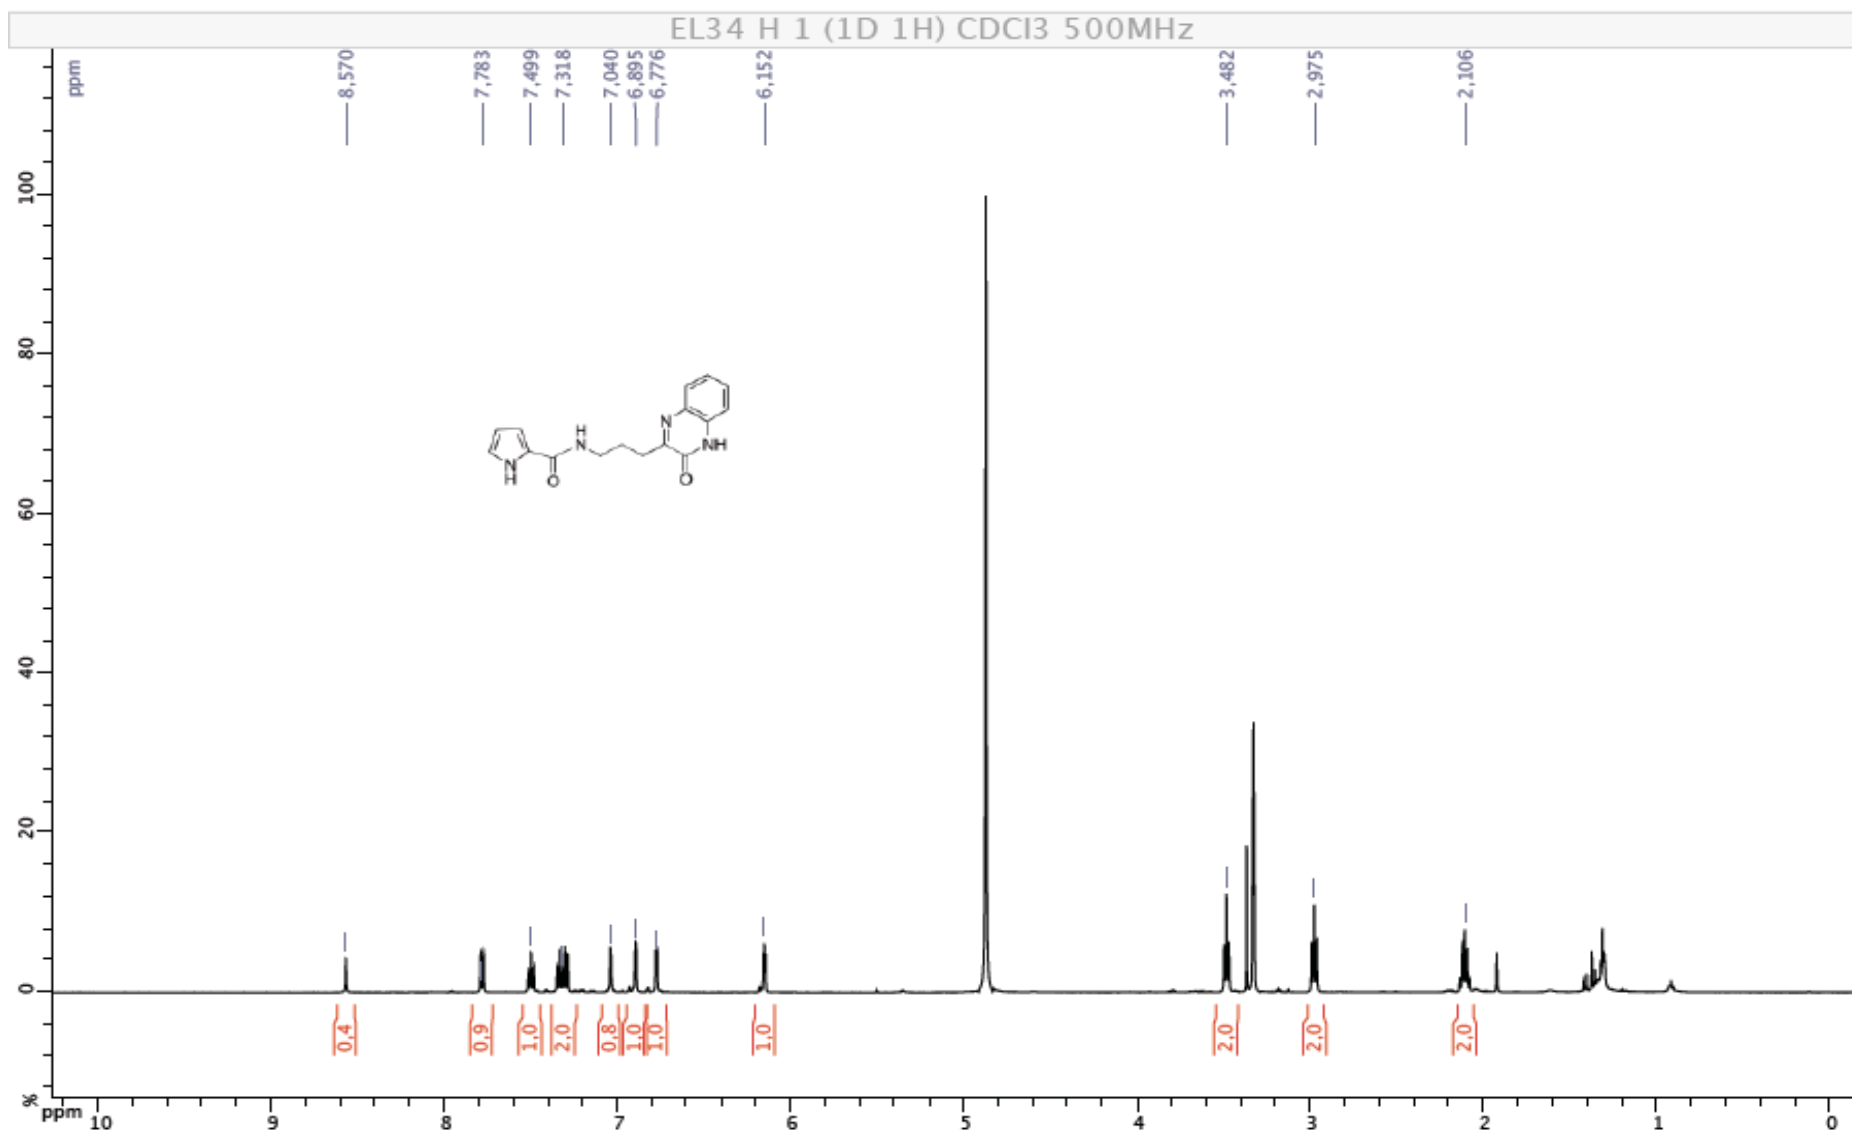

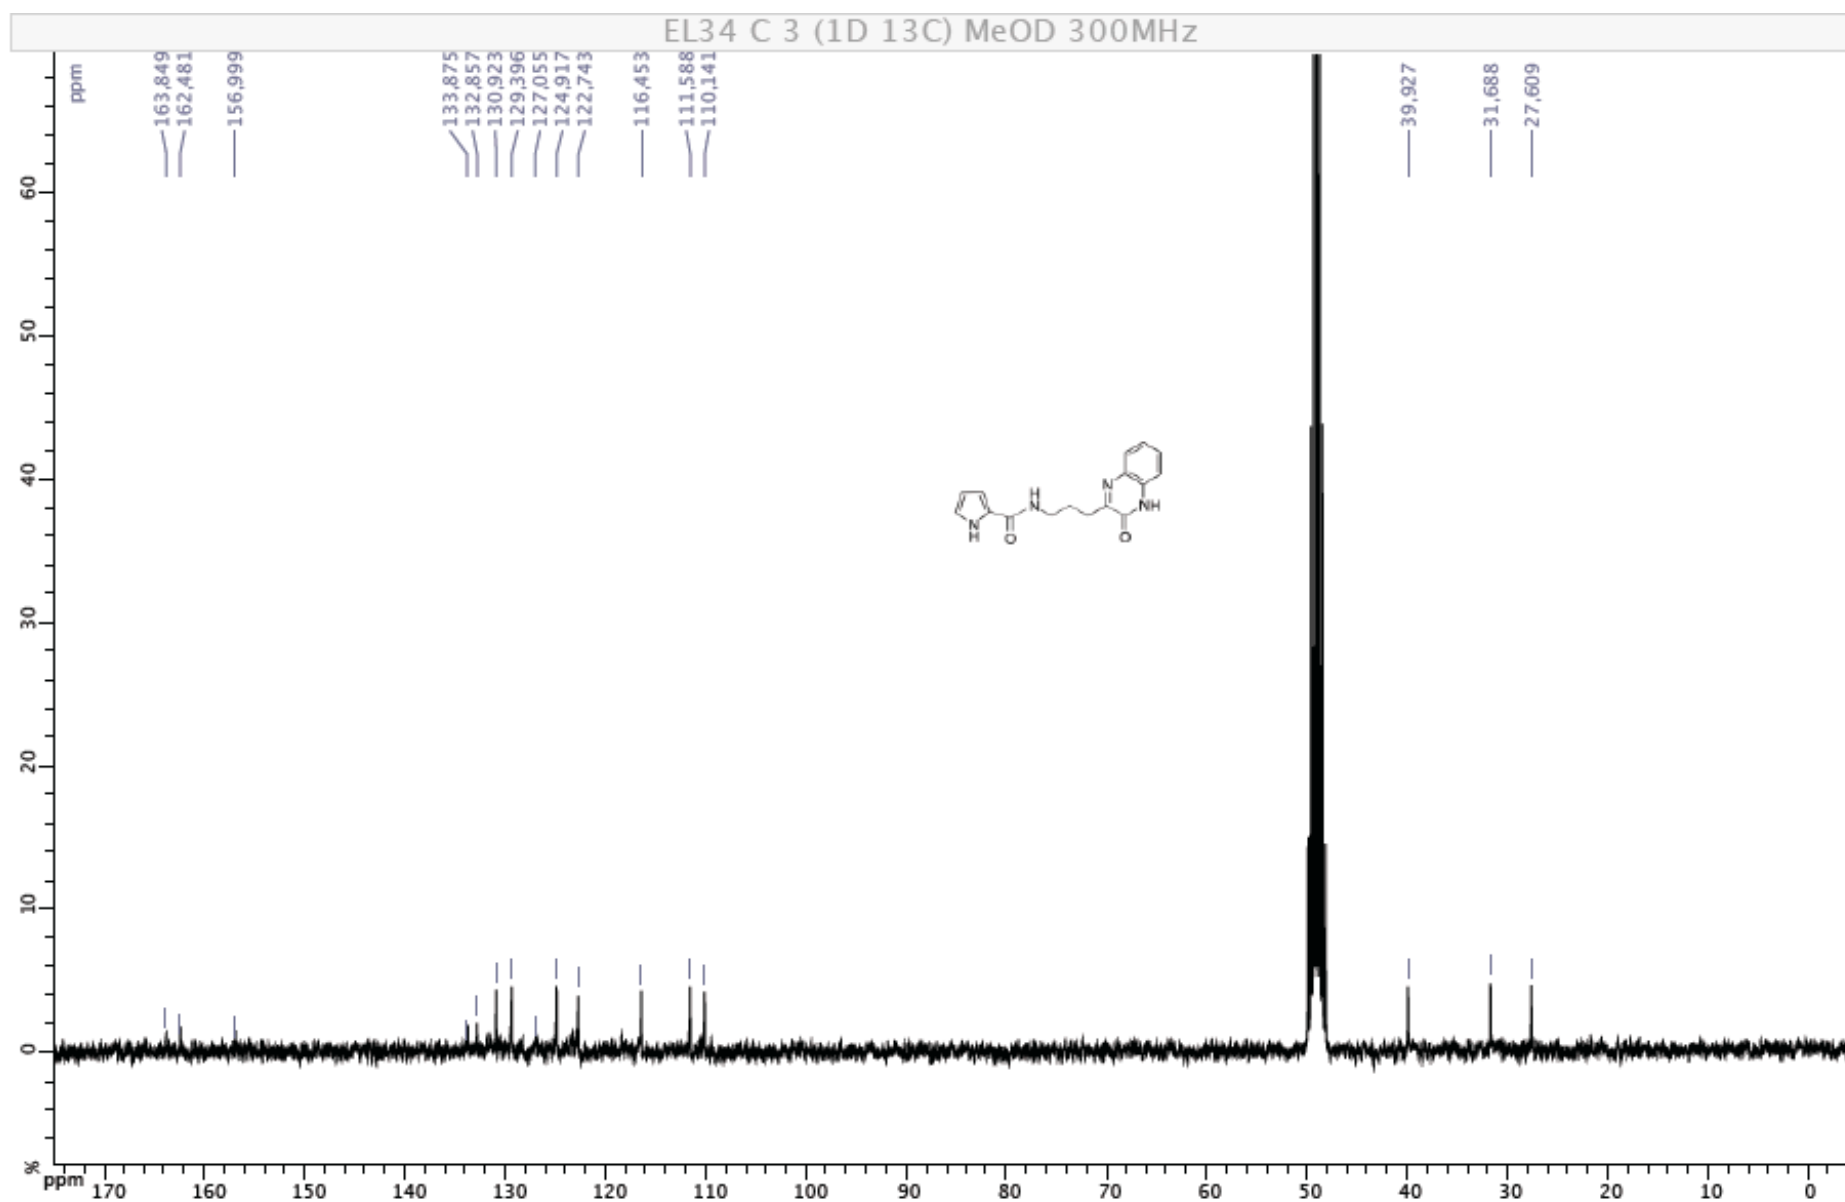

**(Z)-4-((1H-Indol-3-yl)methylene)-2-amino-1H-imidazol-5(4H)-one (7ca)**

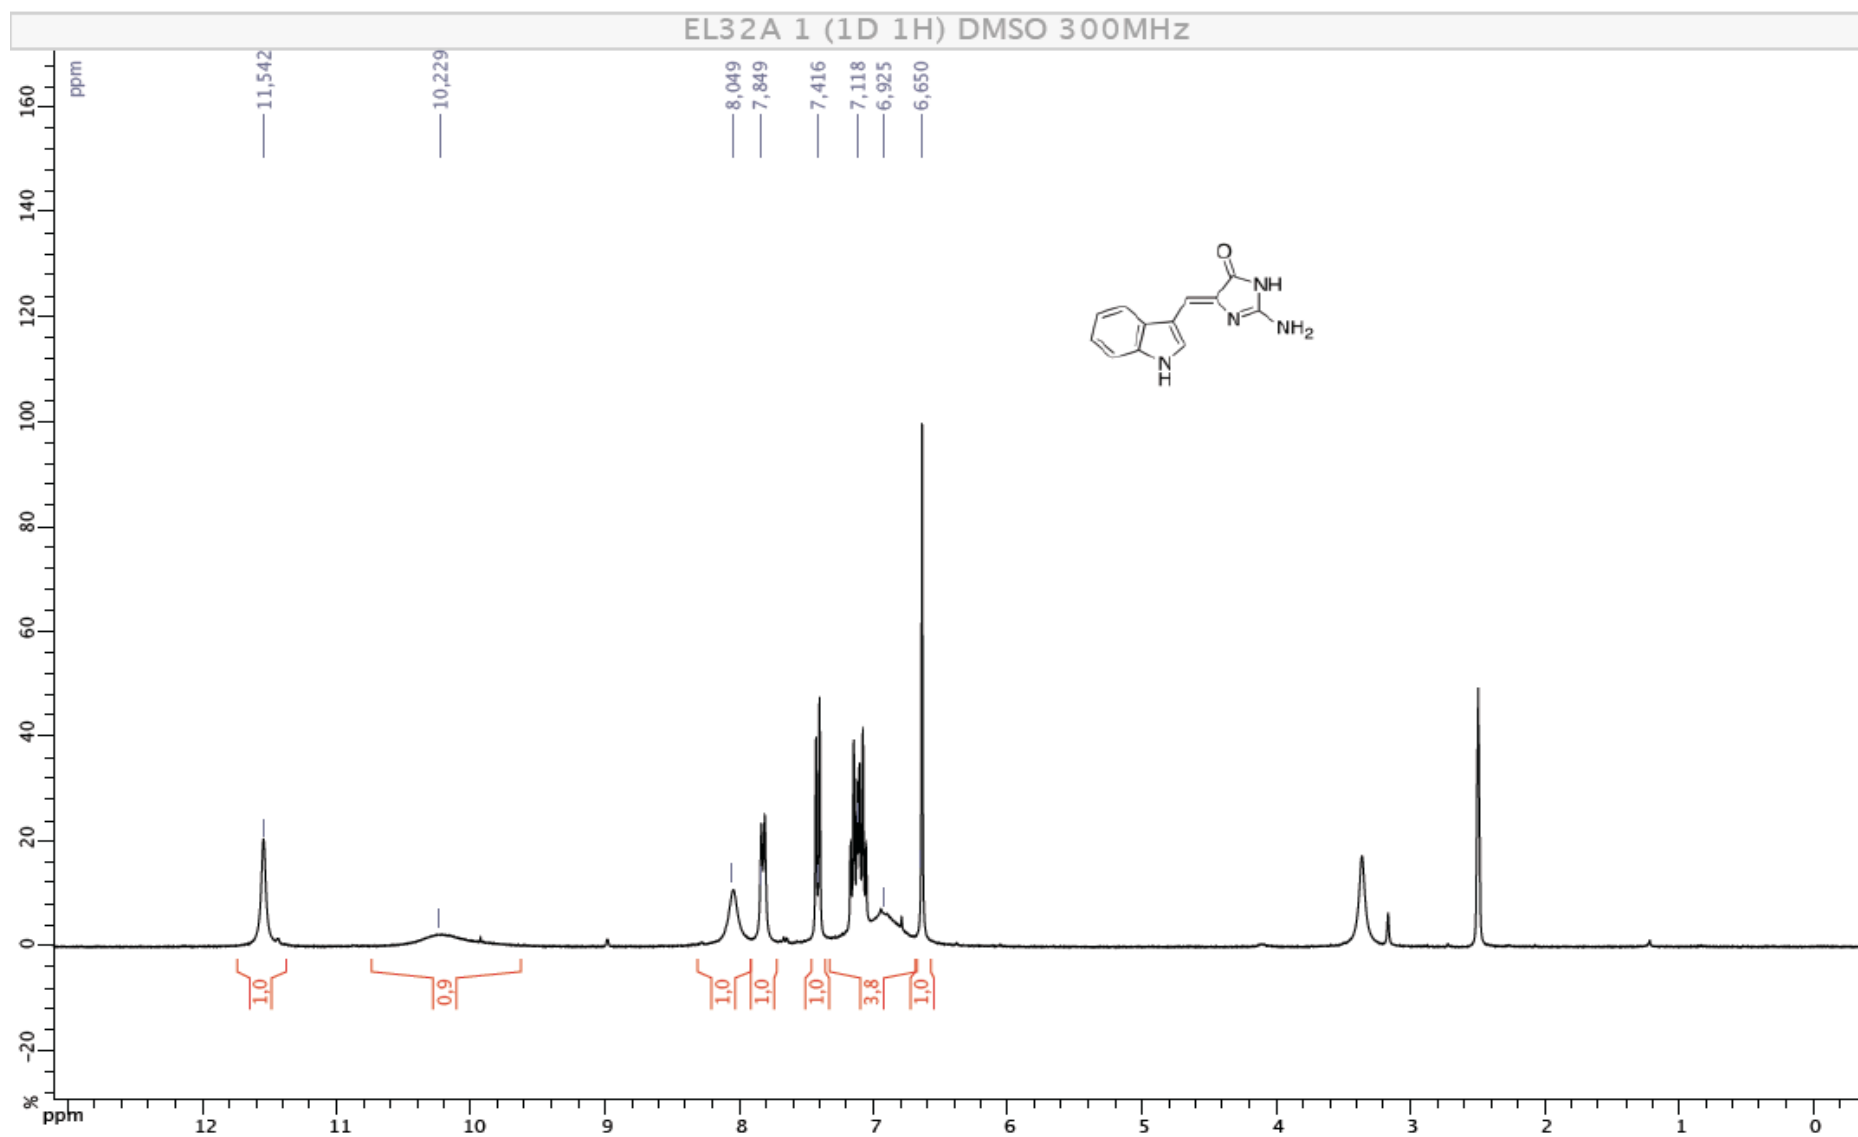

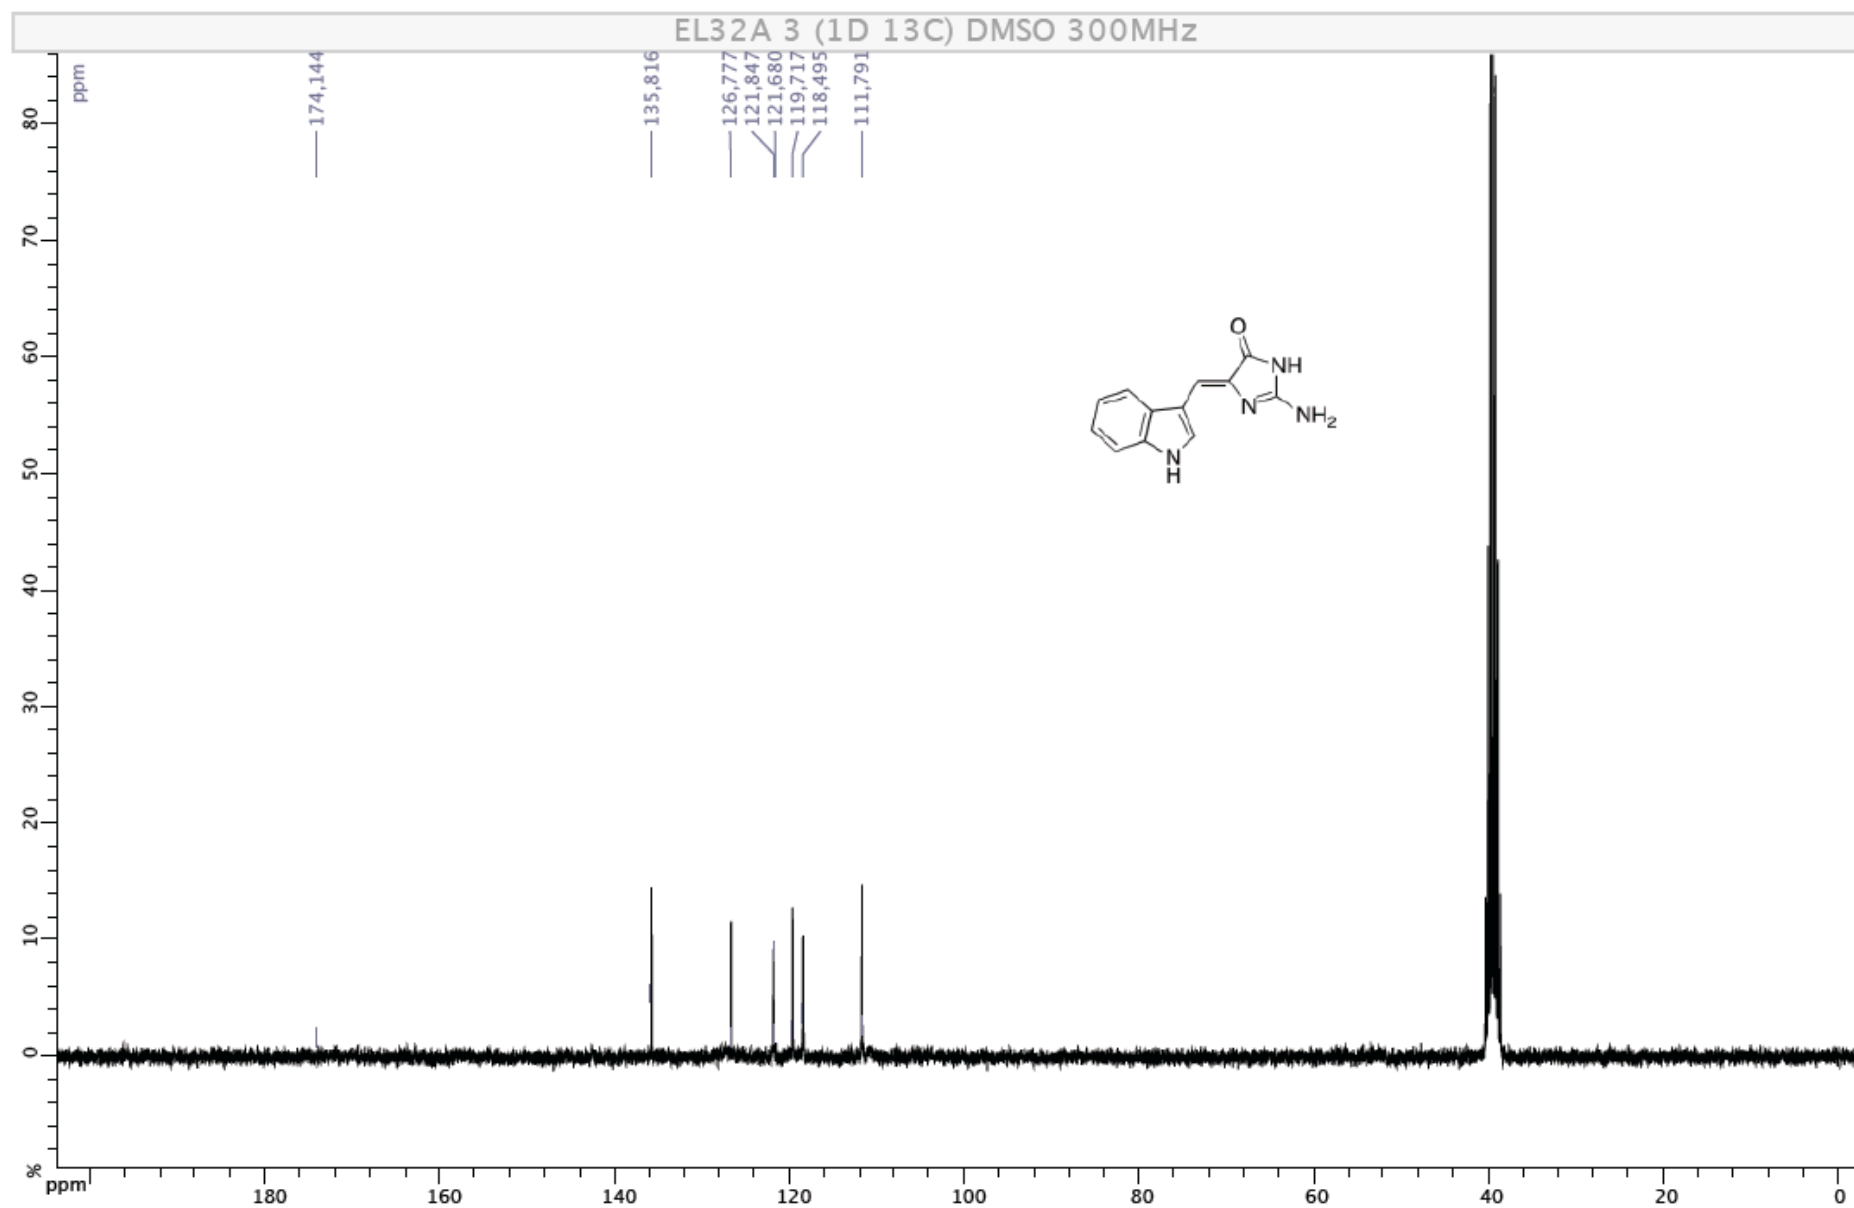

**Ethyl 2-(1*H*-indol-3-yl)-2-(1*H*-pyrrole-2-carboxamido)acetate (Ab)**

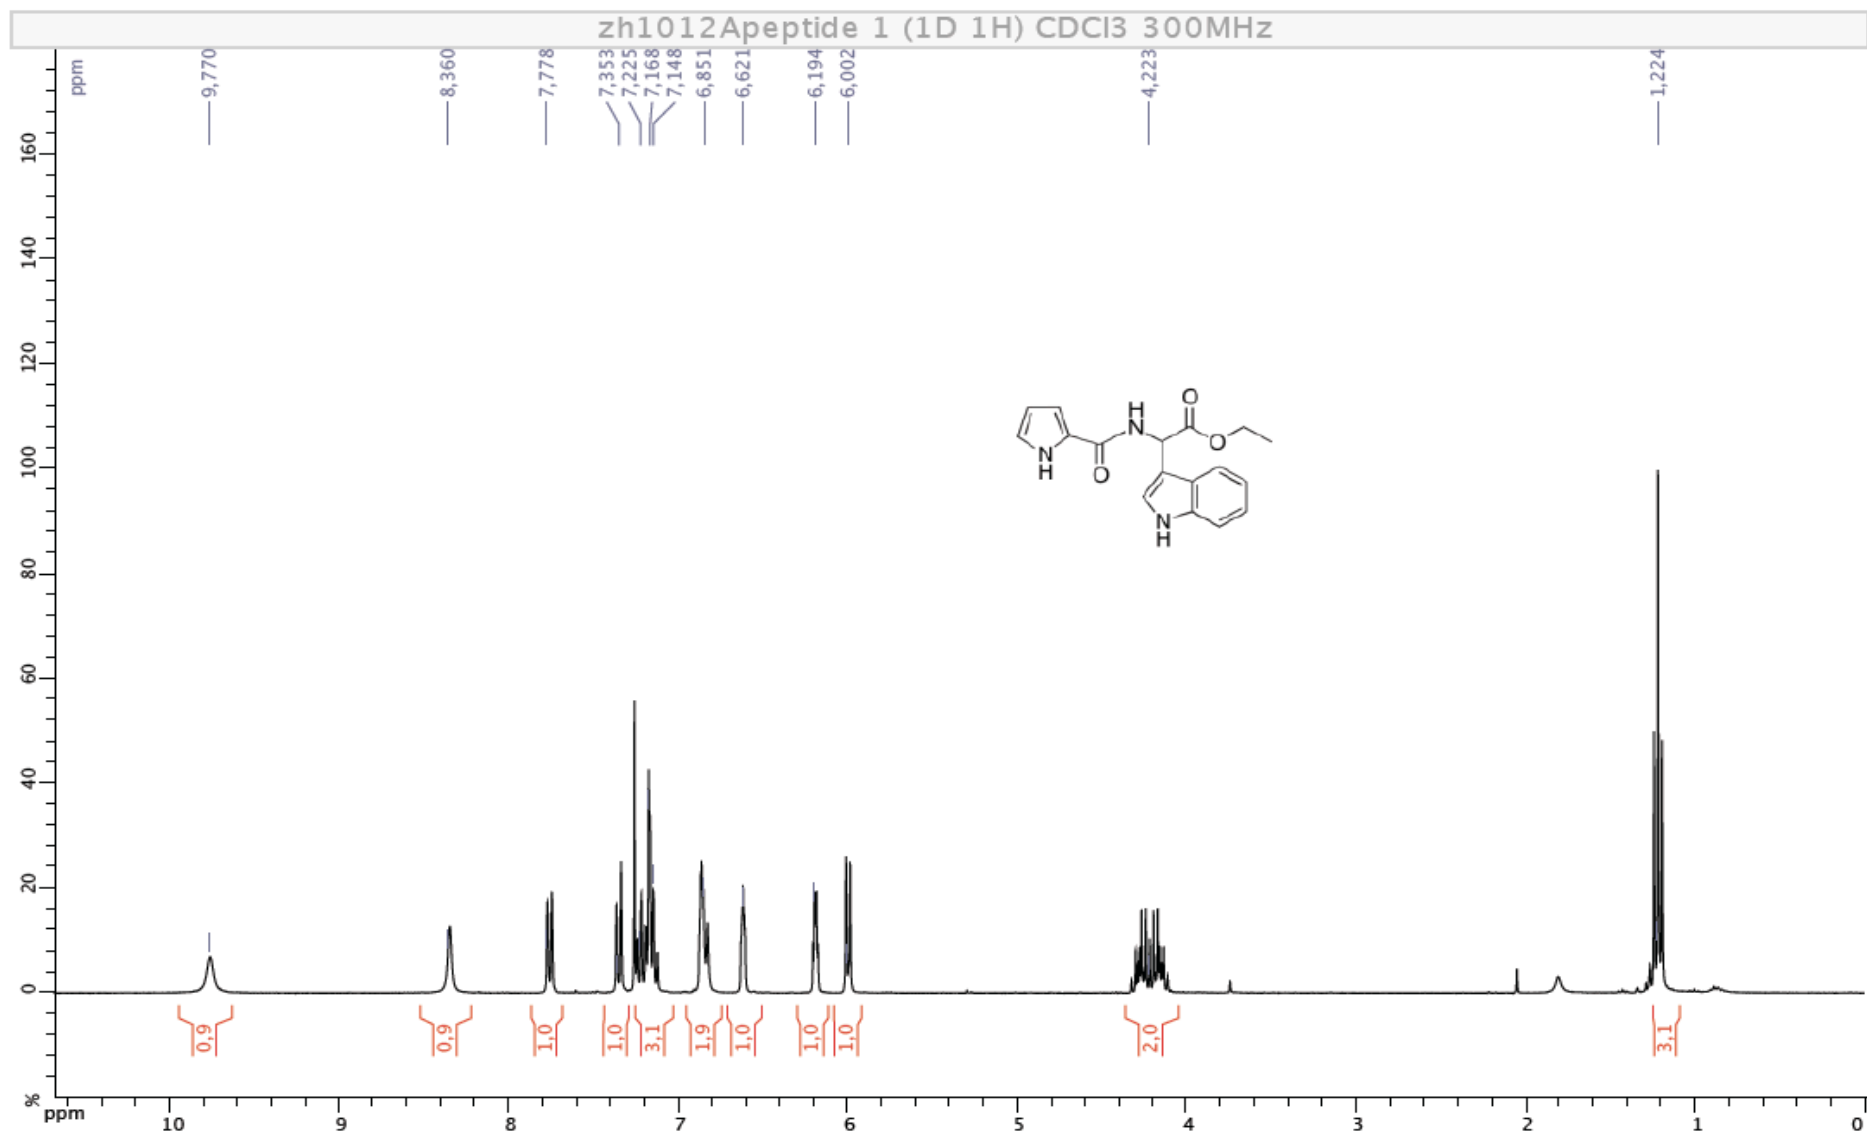



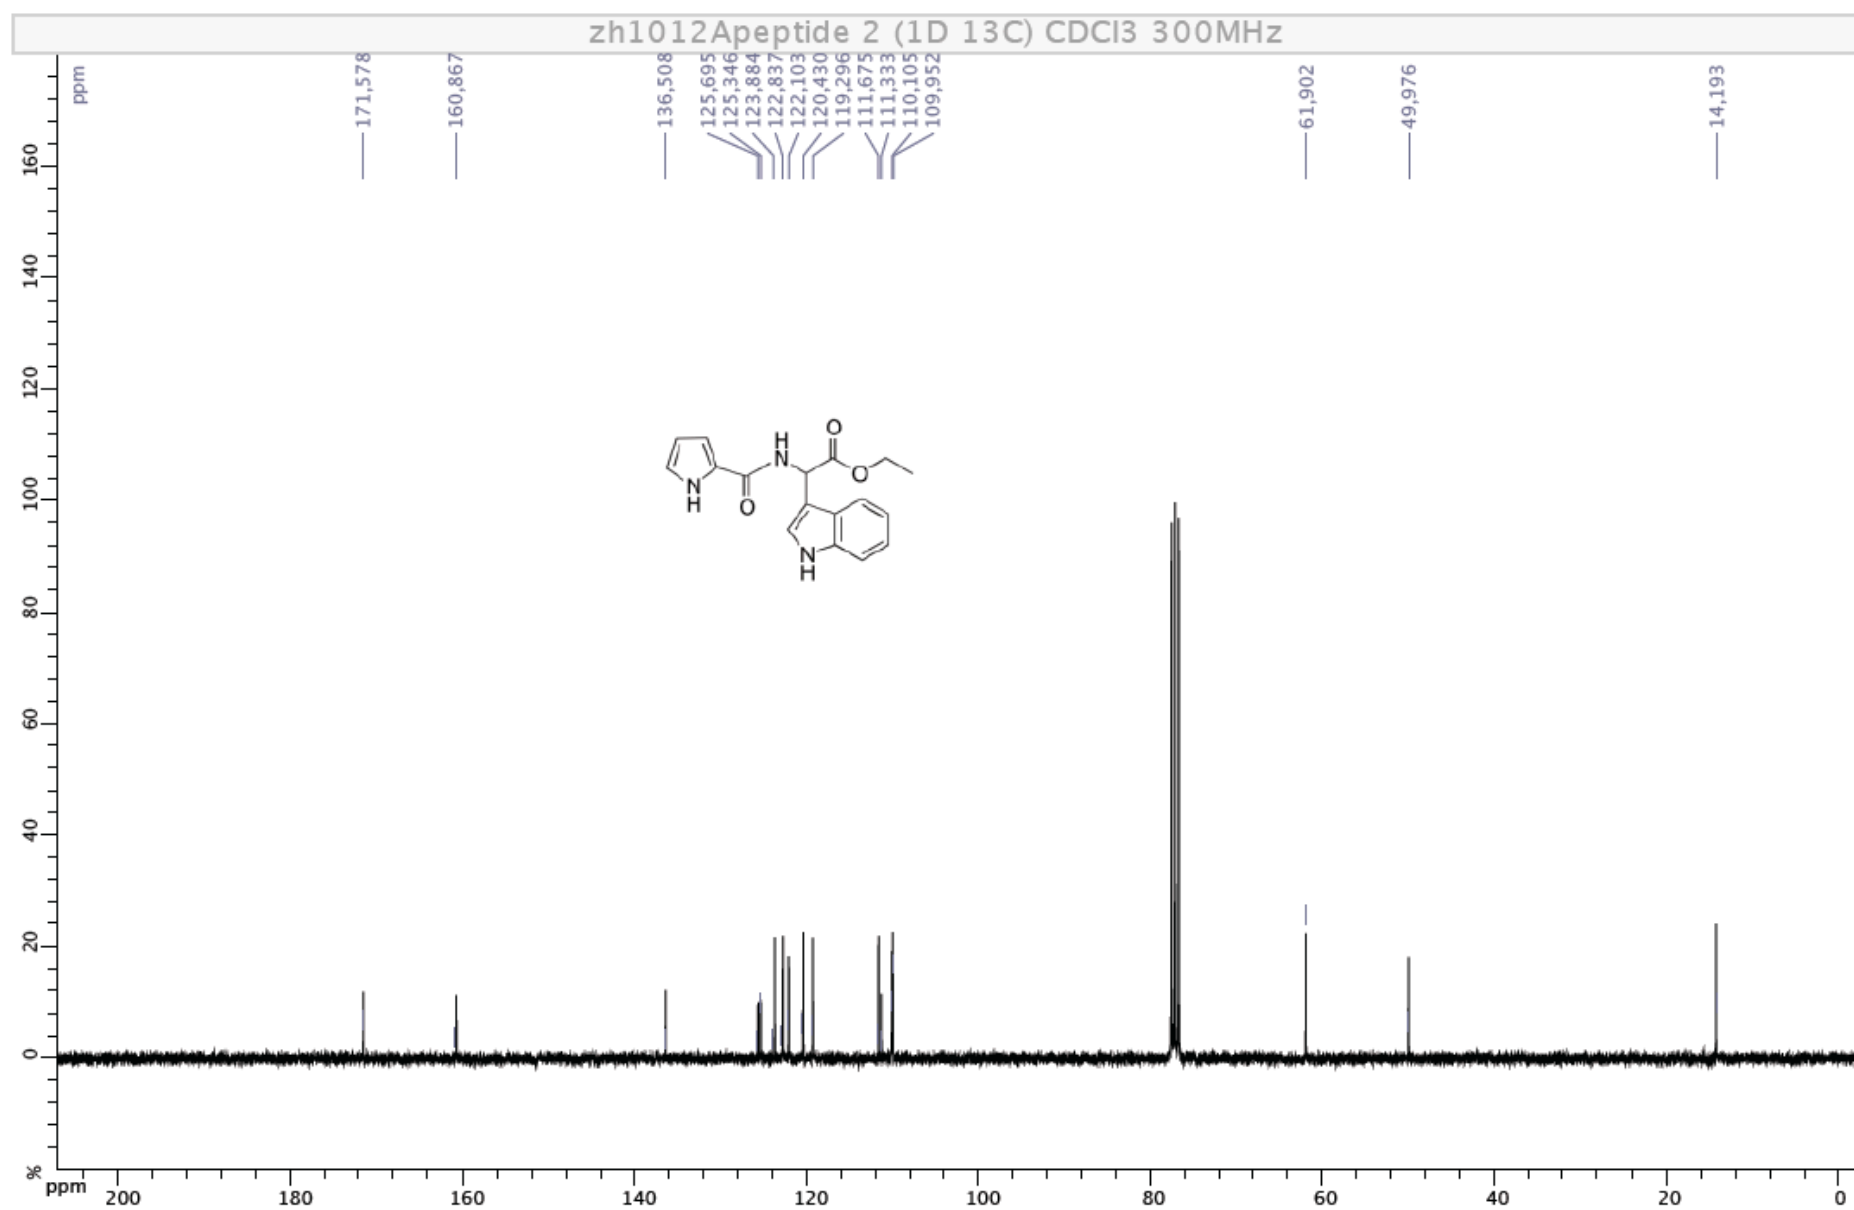

3-(1*H*-Indol-3-yl)-2,3-dihydropyrrolo[1,2-*a*]pyrazine-1,4-dione (1b)

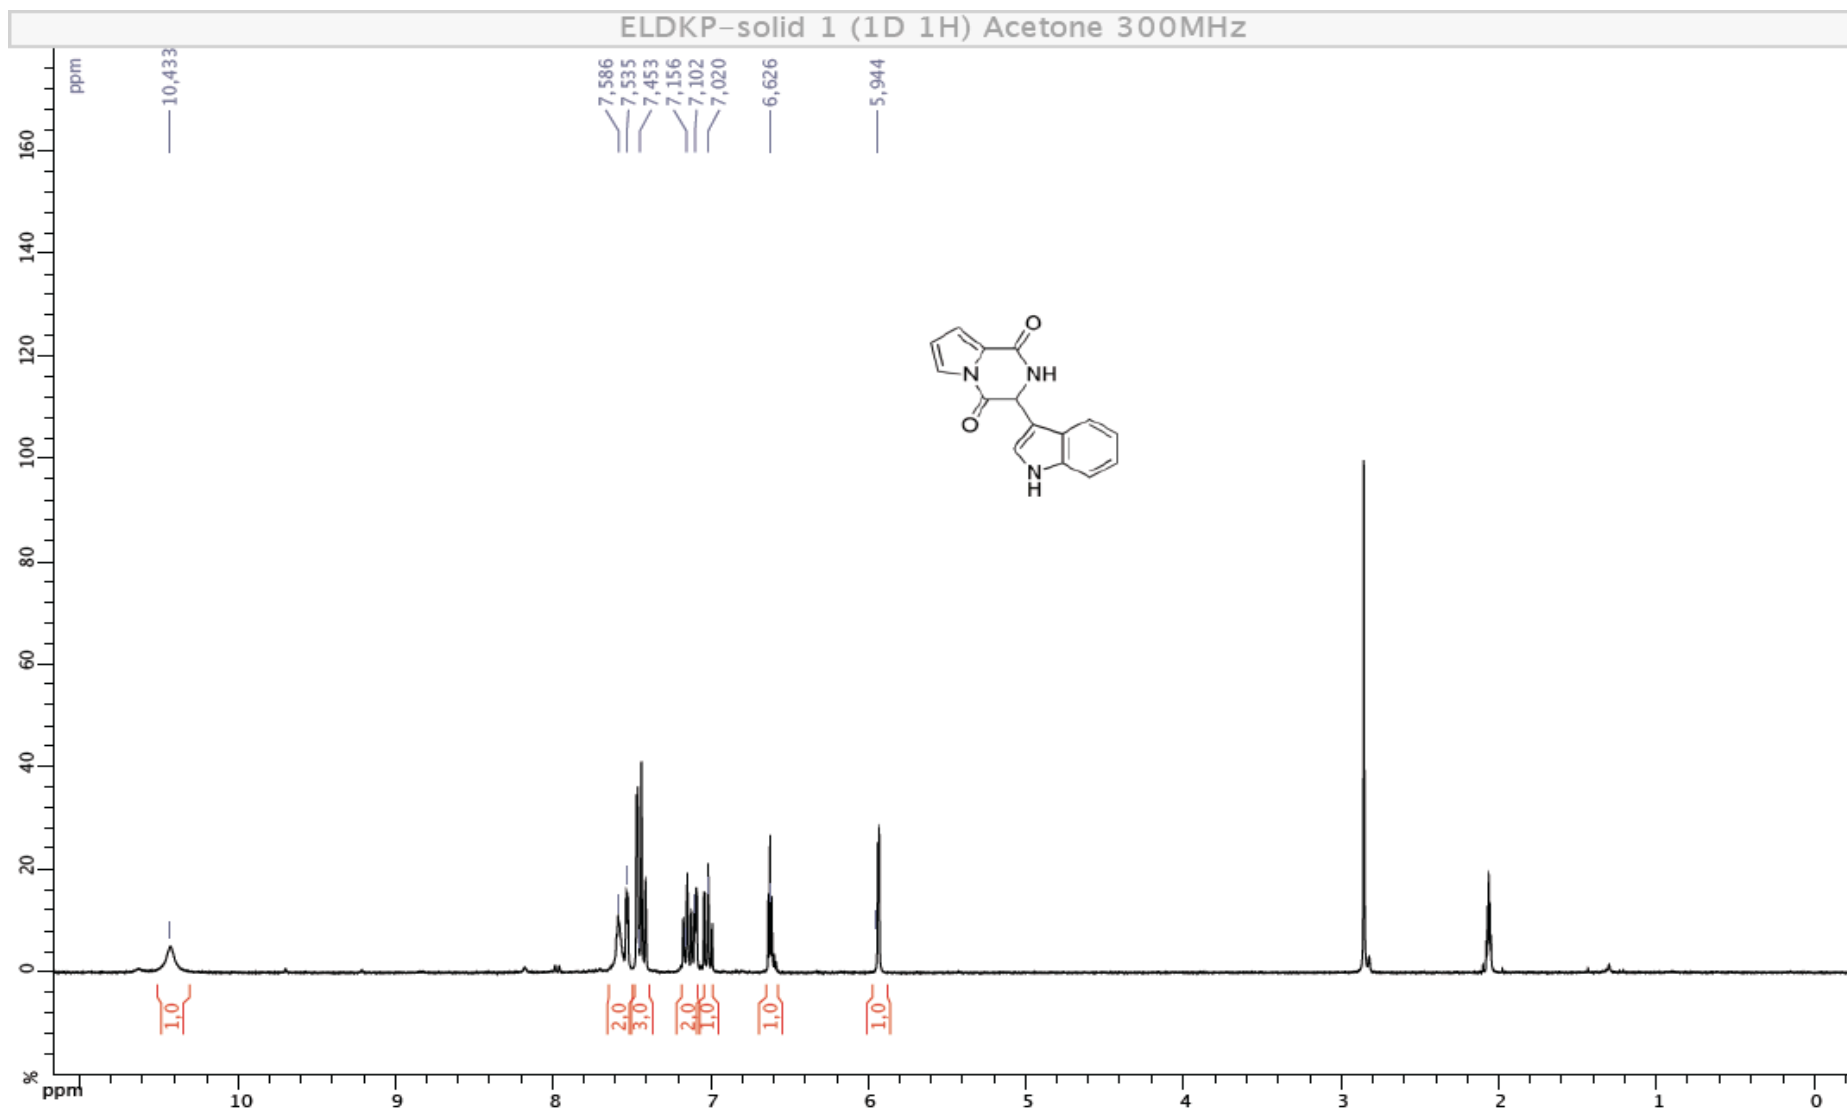

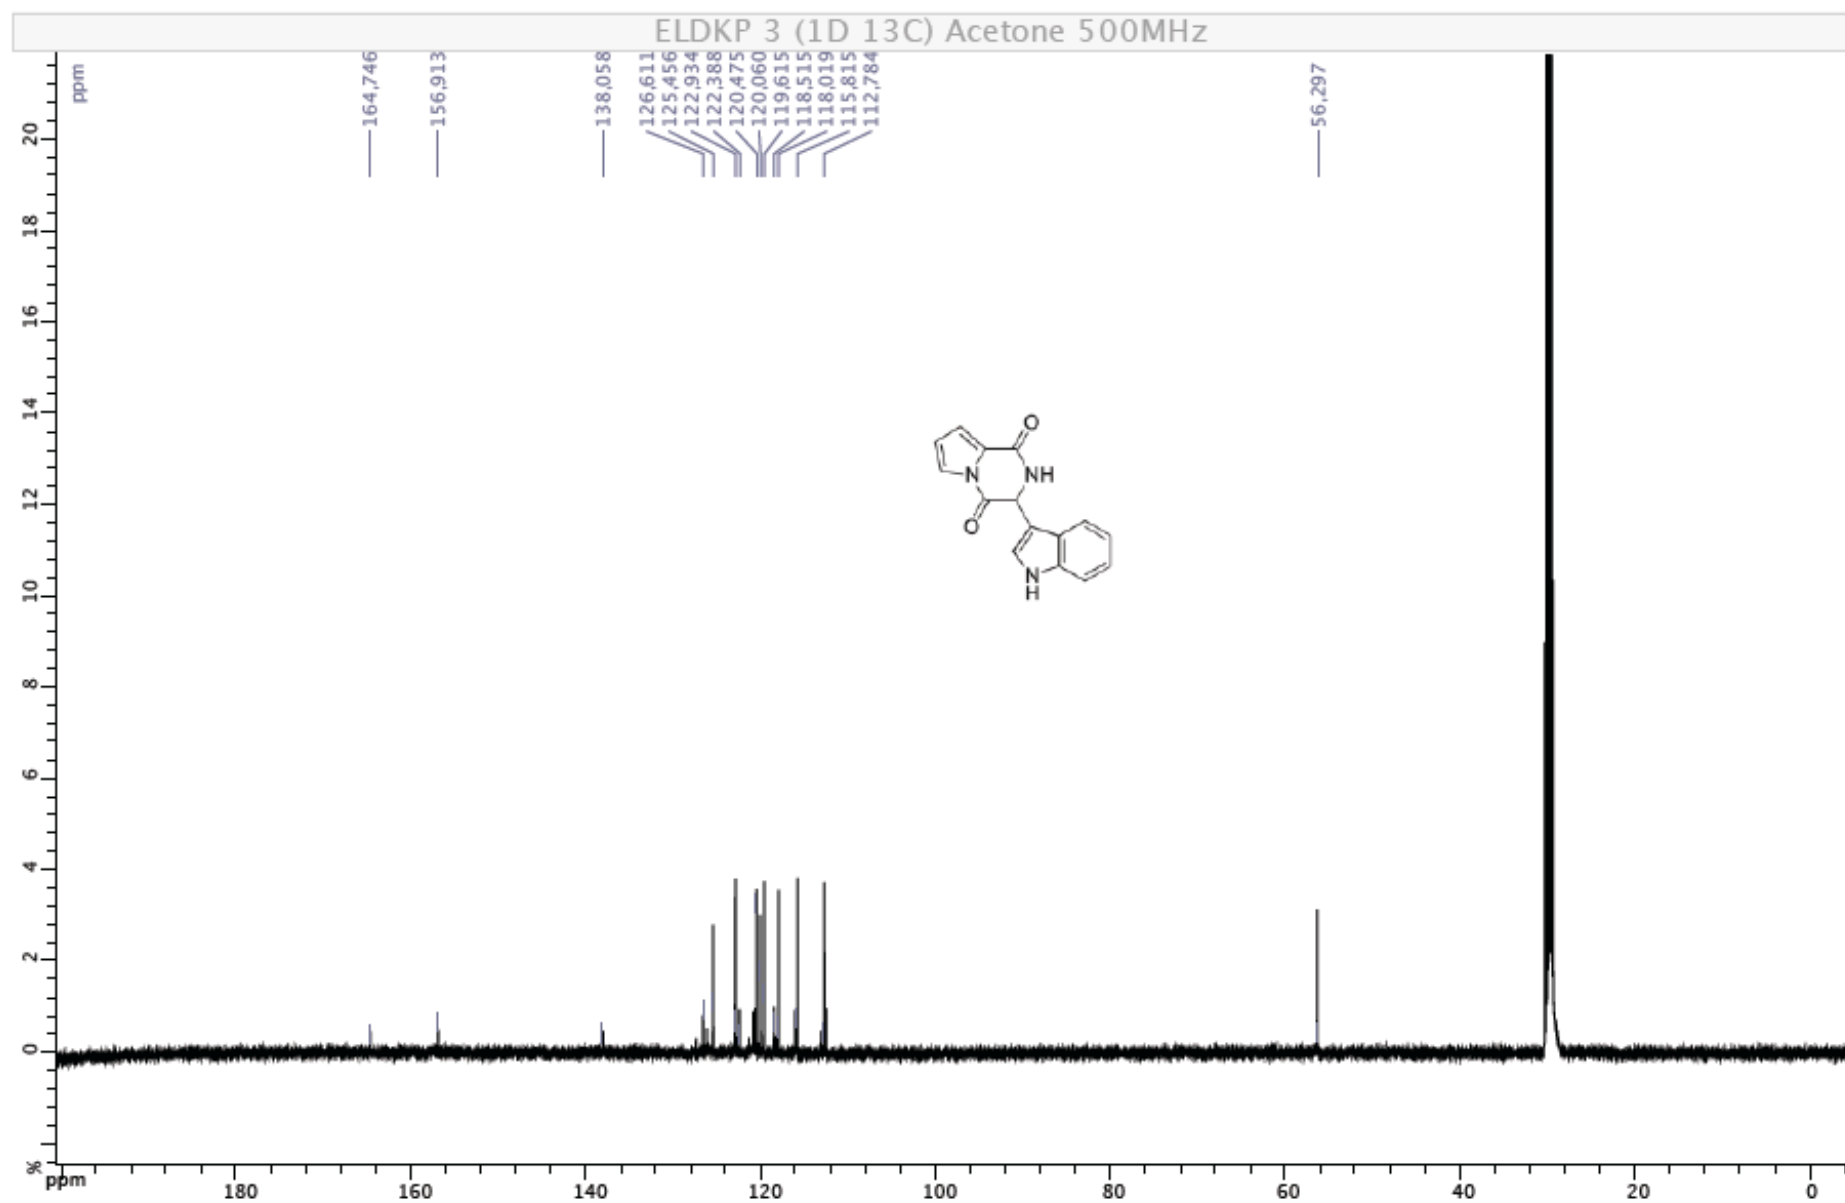

**3-(1*H*-Indol-3-yl)-5,6-dihydropyrazin-2(1*H*)-one (8ba)**

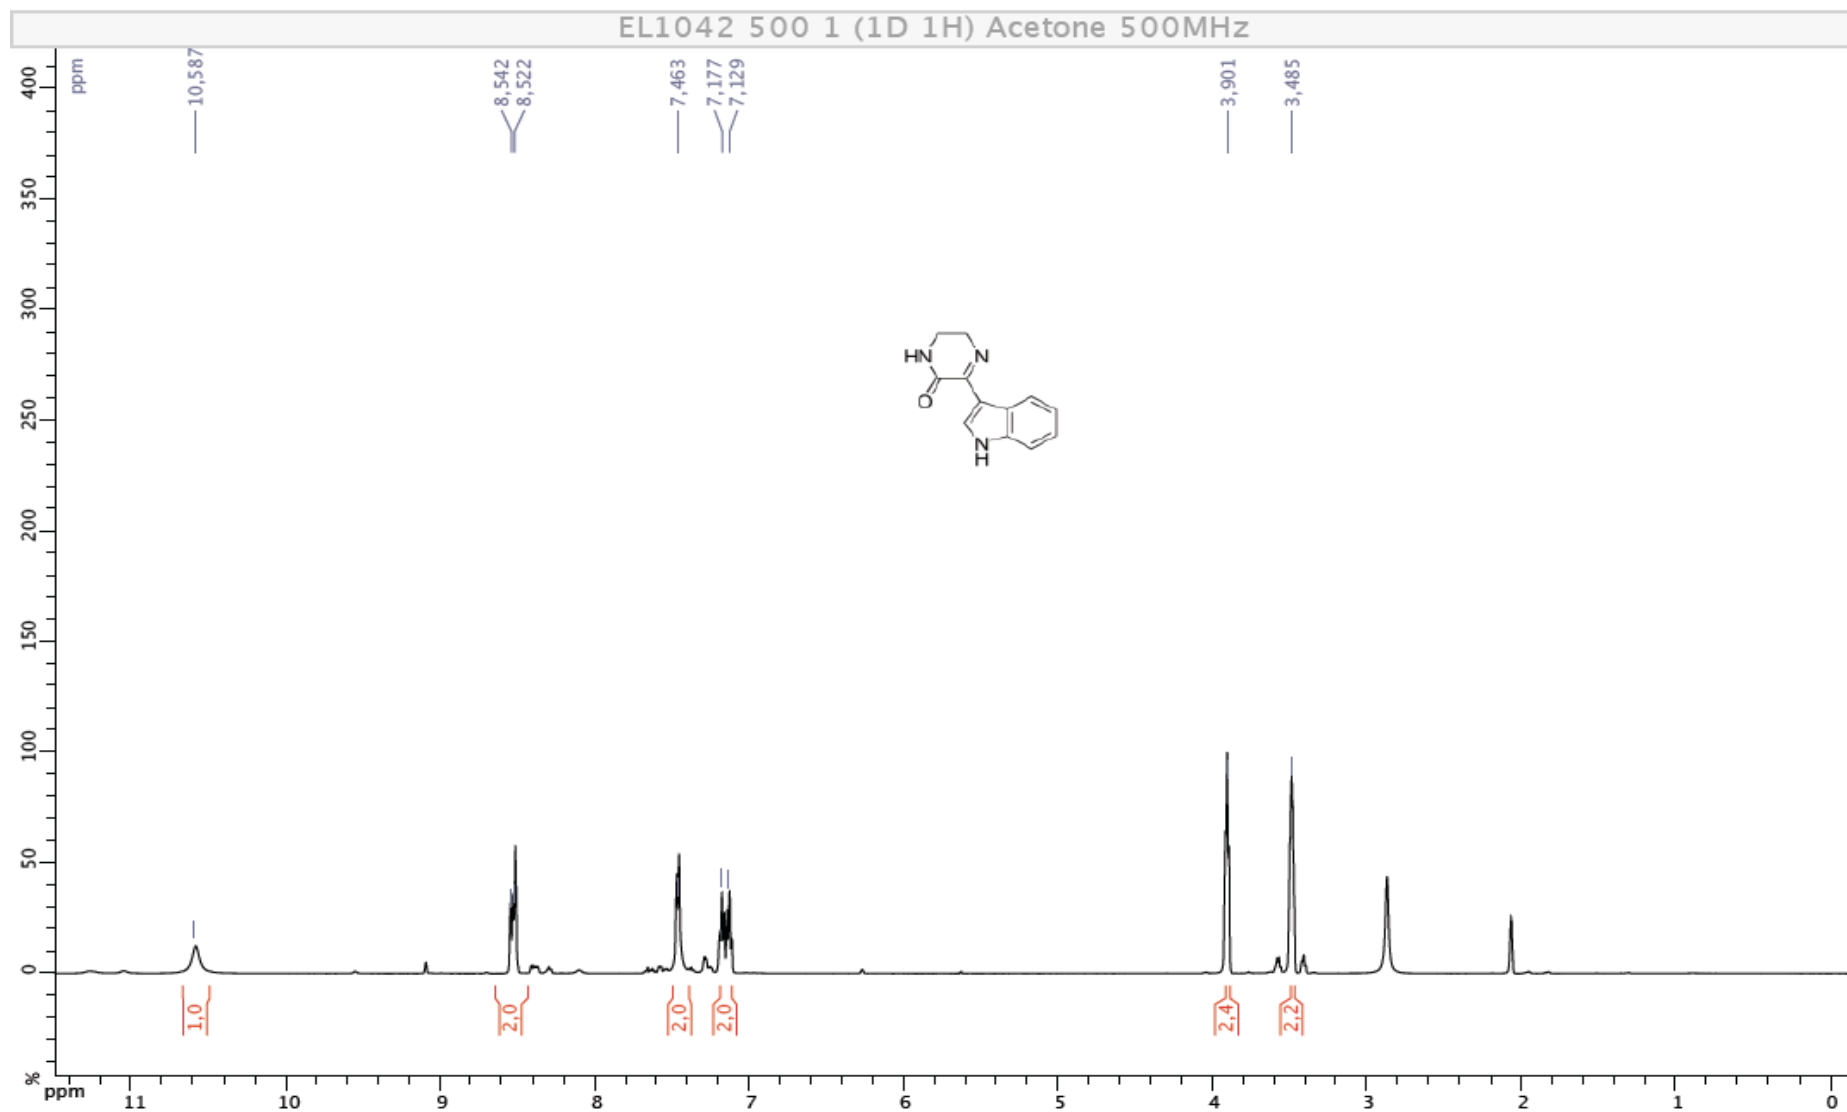

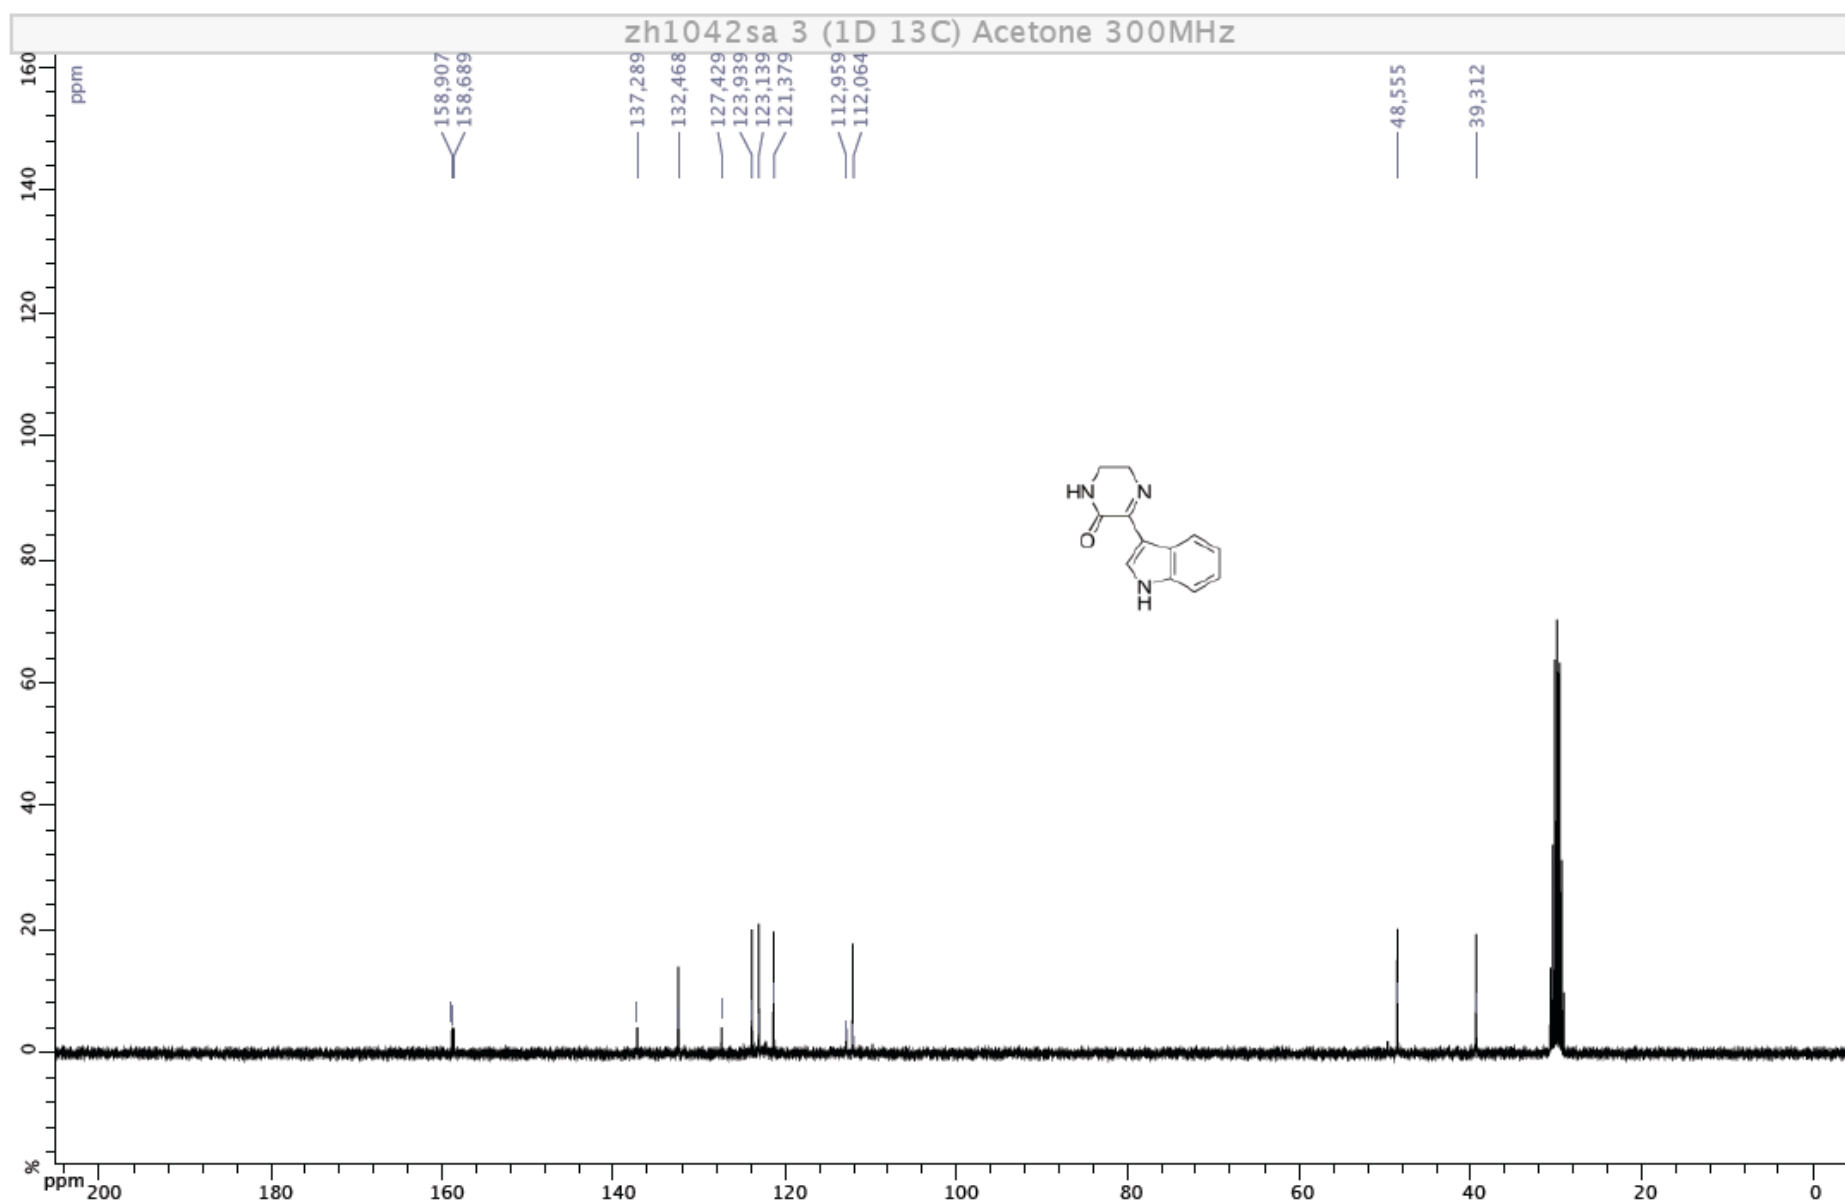

**3,6-Di(1*H*-indol-3-yl)-5,6-dihydropyrazin-2(1*H*)-one (8bb)**

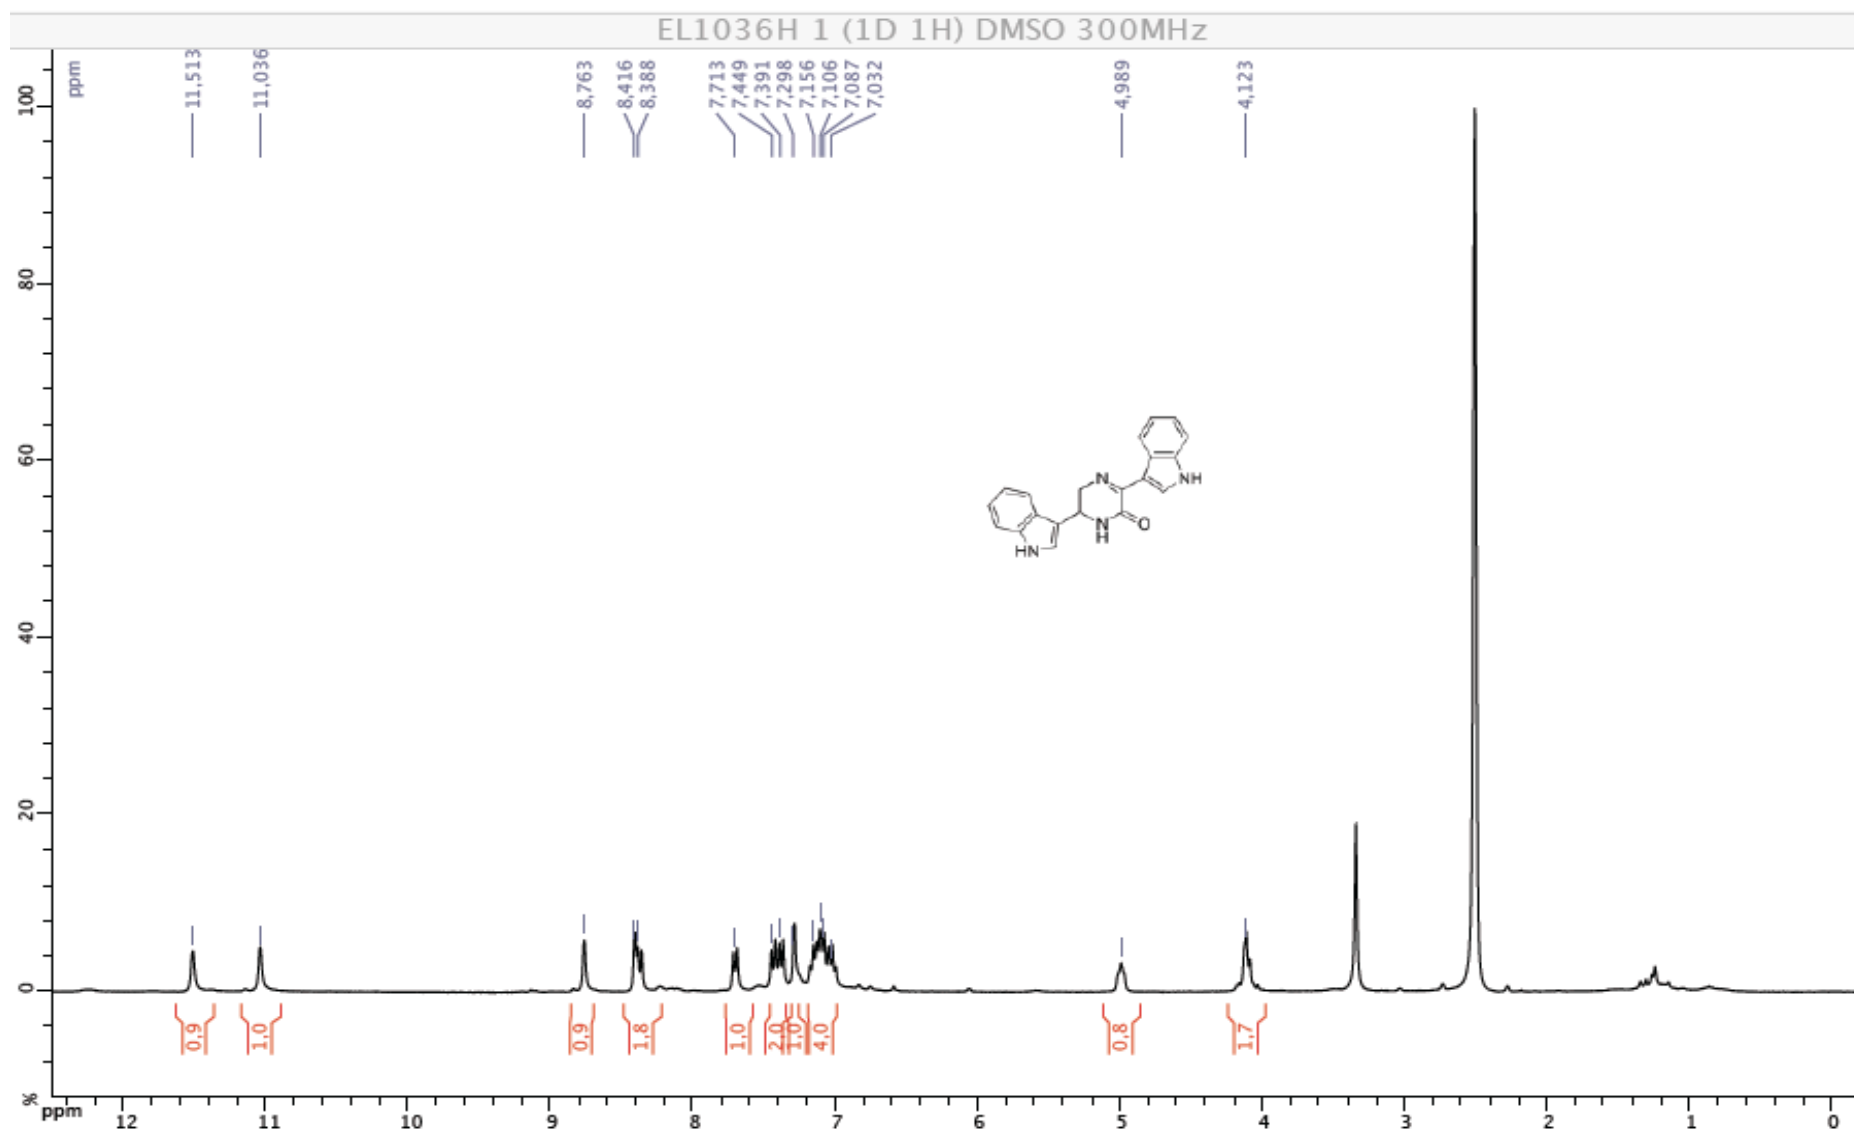

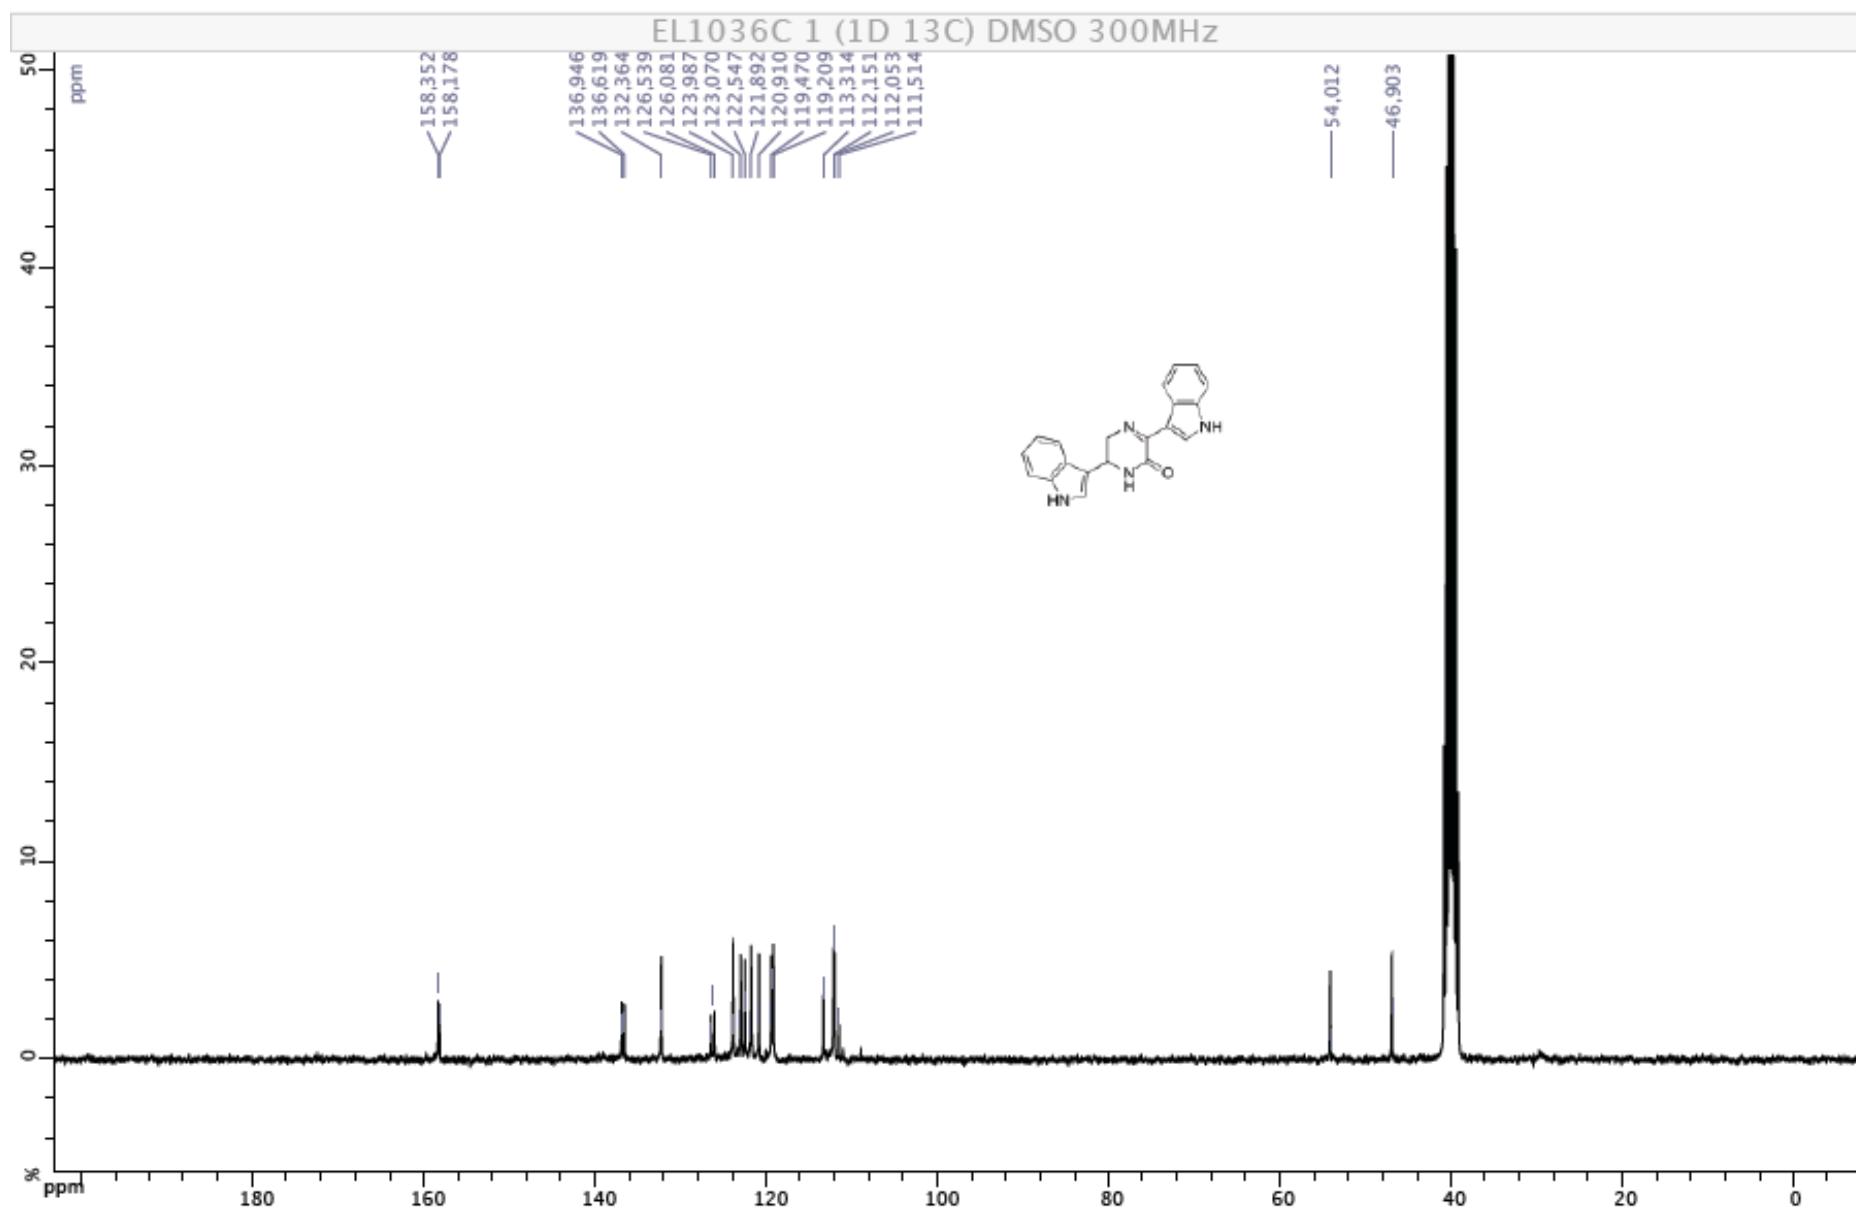

***tert*-Butyl 3-(5-(1*H*-indol-3-yl)-6-oxo-1,2,3,6-tetrahydropyrazin-2-yl)-1*H*-indole-1-carboxylate (8bd)**

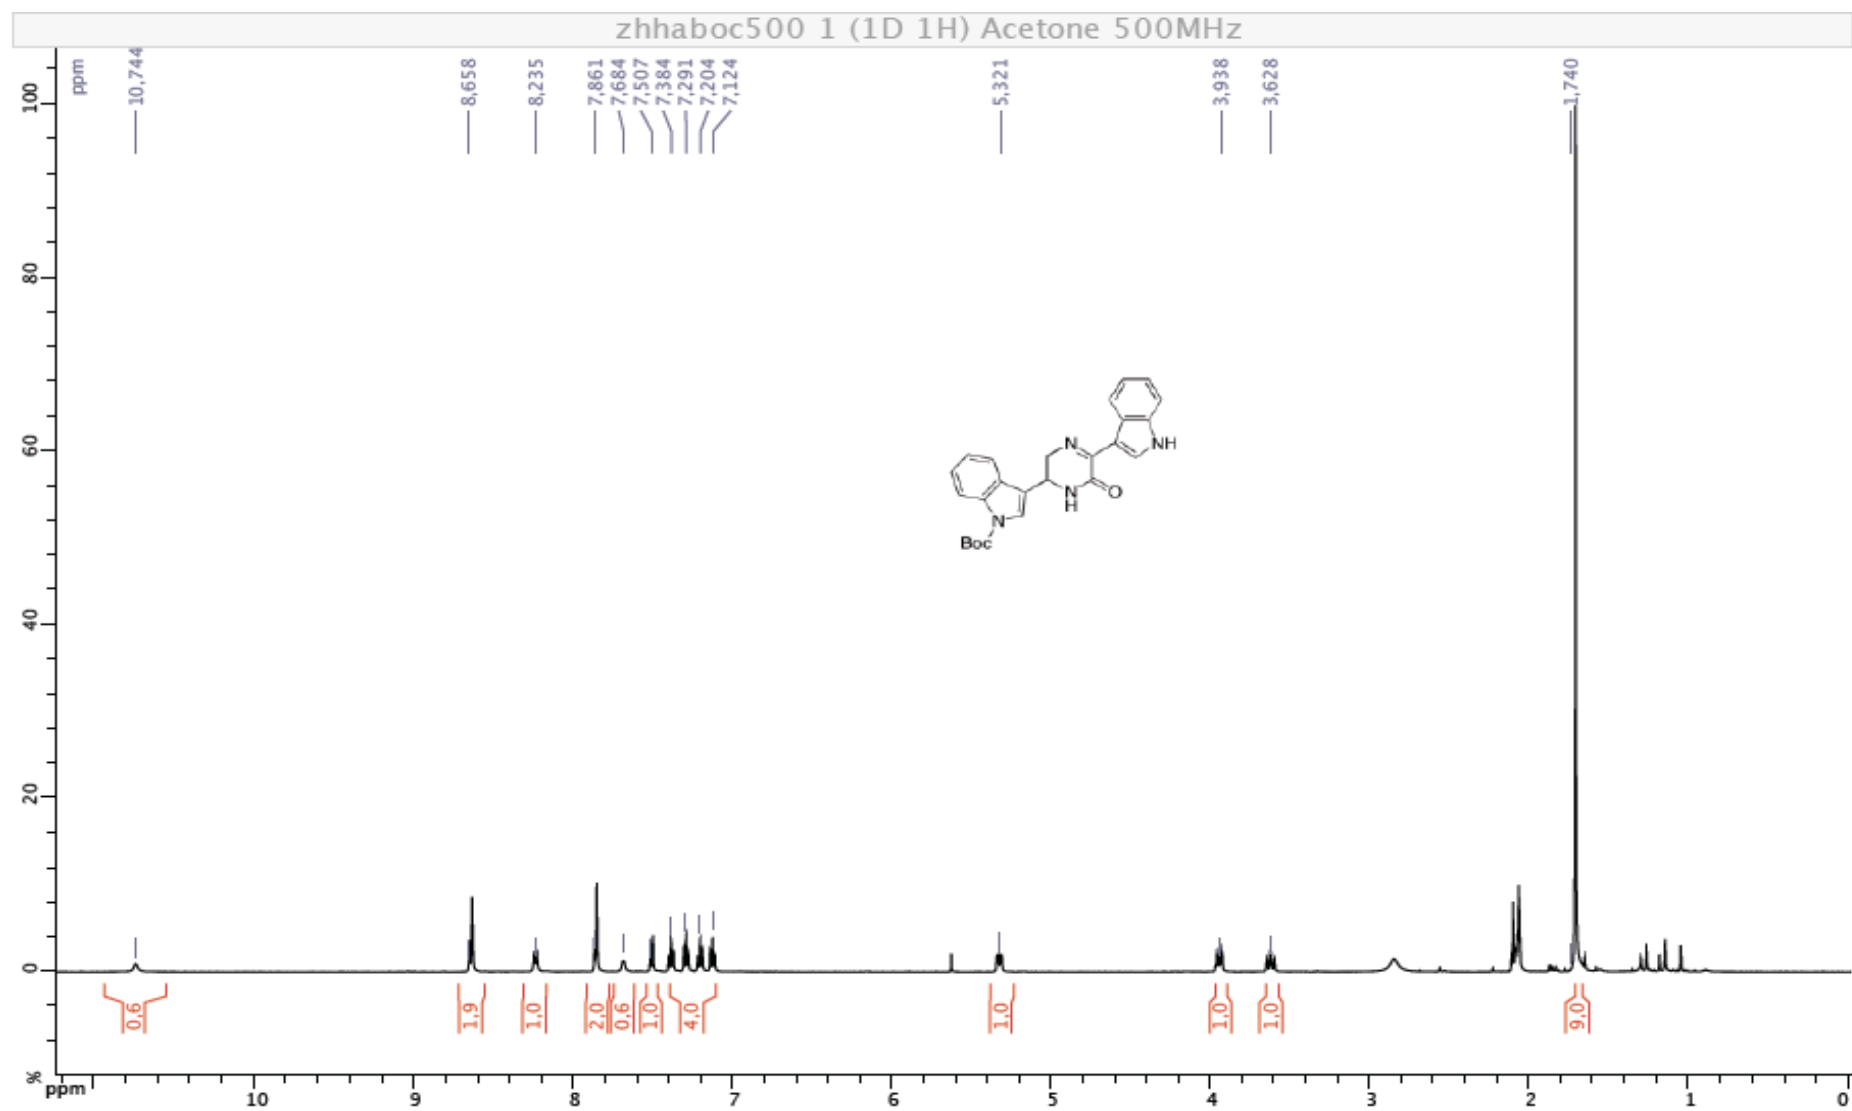



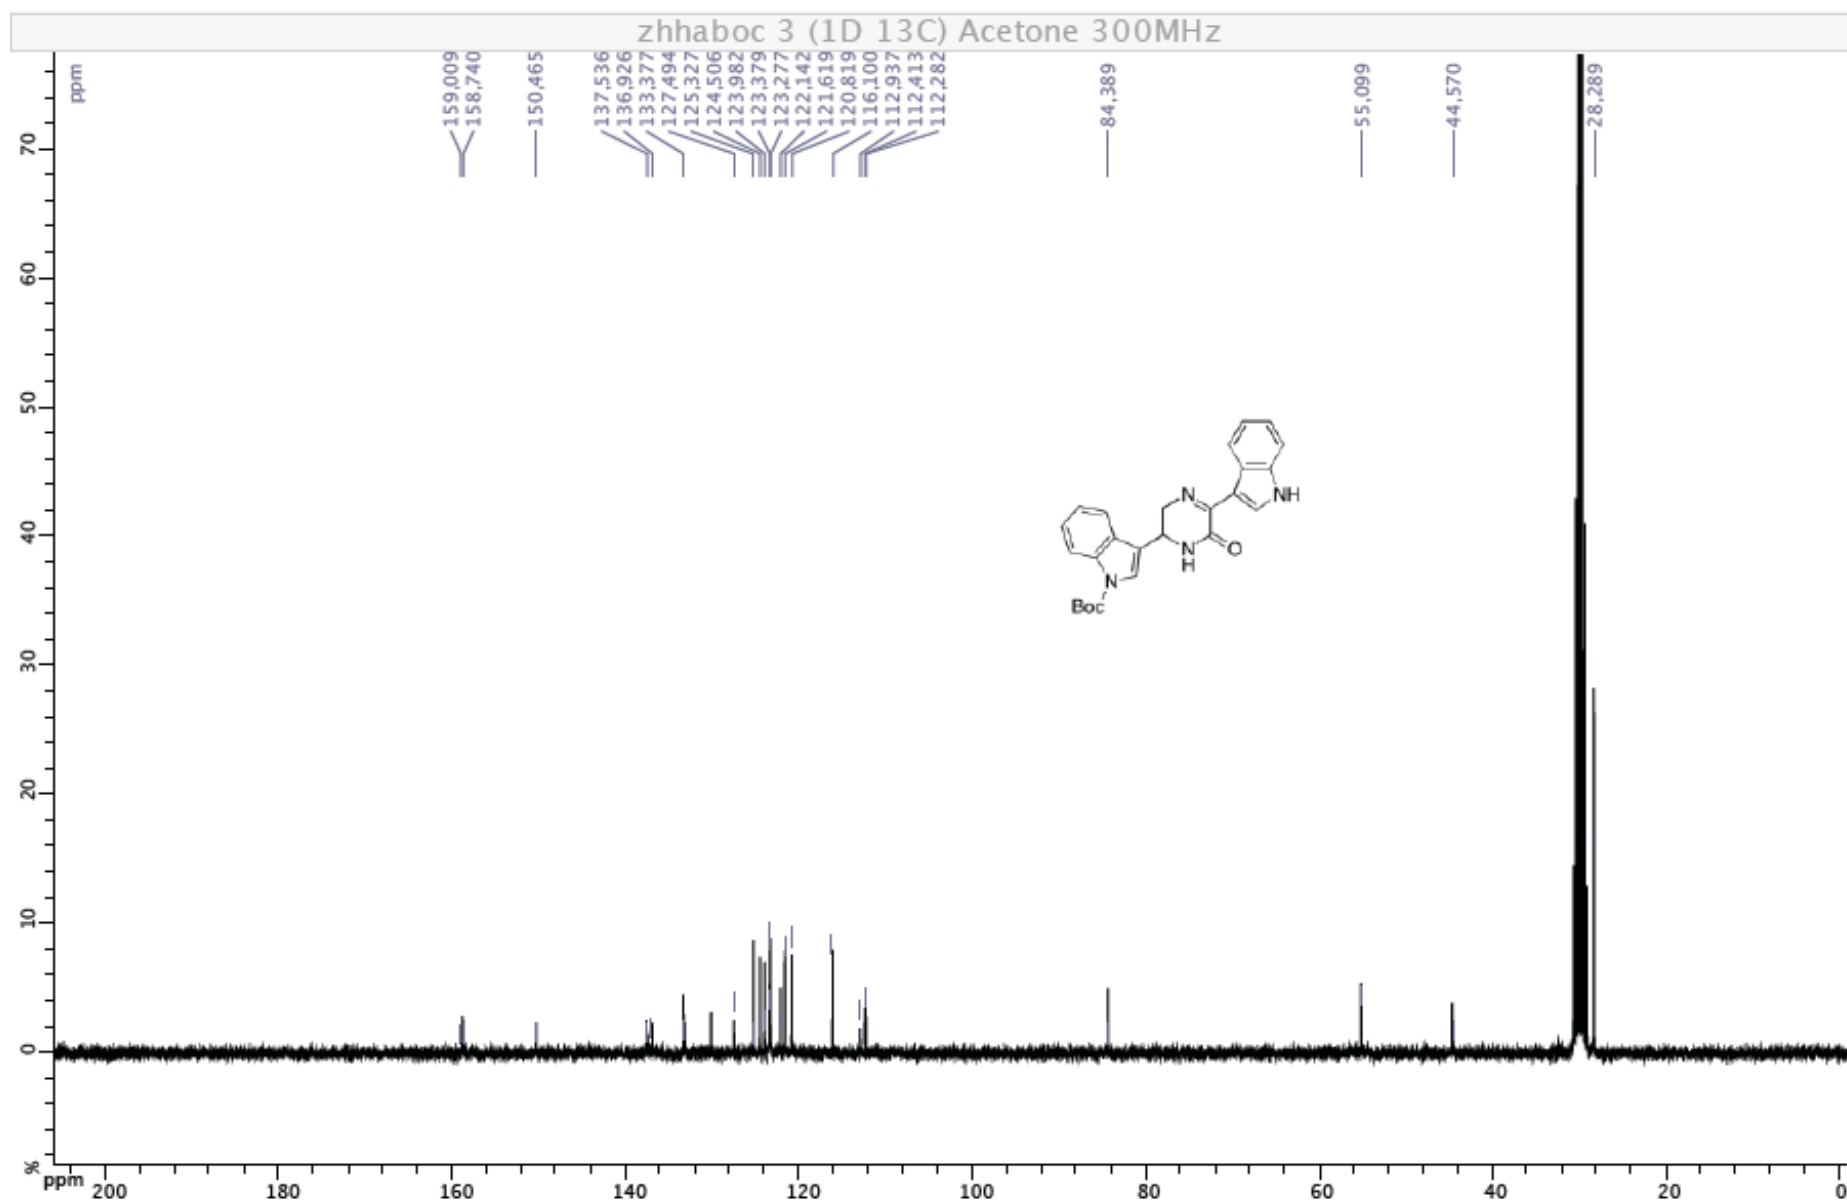

Supplement: Supplementary file 1 [file 3962929]
